1 A short ERK5 isoform modulates nucleocytoplasmic shuttling of active ERK5 and associates  
2 with poor survival in breast cancer

3 Mariska Miranda<sup>1</sup>, Jodi M. Saunus<sup>2</sup>, Seçkin Akgül<sup>1</sup>, Mahdi Moradi Marjaneh<sup>1,3</sup>,  
4 Jamie R. Kutasovic<sup>2</sup>, Wei Shi<sup>1</sup>, Oishee Chatterjee<sup>1,4</sup>, Francesco Casciello<sup>1</sup>, Esdy Rozali<sup>1</sup>,  
5 Herlina Y. Handoko<sup>1</sup>, Adrian P. Wiegman<sup>1</sup>, Tianqing Liu<sup>1</sup>, Jason S. Lee<sup>1</sup>, Bryan W. Day<sup>1</sup>,  
6 Stacey L. Edwards<sup>1,4</sup>, Juliet D. French<sup>1</sup>, Amy E. McCart Reed<sup>2</sup>, Georgia Chenevix-Trench<sup>1</sup>,  
7 Kum Kum Khanna<sup>1</sup>, Peter T. Simpson<sup>2</sup>, Sunil R. Lakhani<sup>2,5</sup> and Fares Al-Ejeh<sup>1,4,6</sup> \*

8 <sup>1</sup> Cancer Program, QIMR Berghofer Medical Research Institute, Herston, Australia

9 <sup>2</sup> UQ Centre for Clinical Research, The University of Queensland, Herston, Australia

10 <sup>3</sup> Currently at Department of Infectious Disease, Imperial College London, London, UK

11 <sup>4</sup> Faculty of Medicine, University of Queensland, St Lucia QLD 4072, Australia

12 <sup>5</sup> Pathology Queensland, The Royal Brisbane & Women's Hospital, Herston, Australia

13 <sup>6</sup> Currently at the Qatar Biomedical Research Institute, Doha, Qatar

14 \* Correspondence: [FAIEjeh@hbku.edu.qa](mailto:FAIEjeh@hbku.edu.qa); Tel.: +974 311 87 870

## 15 **Abstract**

16 **Background:** The nucleocytoplasmic shuttling of ERK5 has gained recent attention as a  
17 regulator of its diverse roles in cancer progression but the exact mechanisms for this shuttling  
18 are still under investigation.

19 **Methods:** Using *in vitro*, *in vivo* and *in silico* studies, we investigated the roles of shorter ERK5  
20 isoforms in regulating the nucleocytoplasmic shuttling of active phosphorylated-ERK5 (pERK5).  
21 Retrospective cohorts of primary and metastatic breast cancer cases were used to evaluate the  
22 association of the subcellular localization of pERK5 with clinicopathological features.

23 **Results:** Extranuclear localization of pERK5 was observed during cell migration *in vitro* and at  
24 the invasive fronts of metastatic tumors *in vivo*. The nuclear and extranuclear cell fractions  
25 contained different isoforms of pERK5, which are encoded by splice variants expressed in breast  
26 and other cancers in the TCGA data. One isoform, isoform-3, lacks the C-terminal  
27 transcriptional domain and the nuclear localization signal. The co-expression of isoform-3 and  
28 full-length *ERK5* associated with high epithelial-to-mesenchymal transition (EMT) and poor  
29 patient survival. Experimentally, expressing isoform-3 with full-length ERK5 in breast cancer  
30 cells increased cell migration, drove EMT and led to tamoxifen resistance. In breast cancer  
31 patient samples, pERK5 showed variable subcellular localizations where its extranuclear  
32 localization associated with aggressive clinicopathological features, metastasis, and poor  
33 survival.

34 **Conclusion:** Our studies support a model of ERK5 nucleocytoplasmic shuttling driven by splice  
35 variants in an interplay between mesenchymal and epithelial states during metastasis. Using  
36 ERK5 as a biomarker and a therapeutic target should account for its splicing and  
37 context-dependent biological functions.

## 38 **Keywords**

39 ERK5, ERK5 isoforms, nucleocytoplasmic shuttling, metastasis, epithelial-mesenchymal  
40 transition.

## 41 Graphical Abstract

42

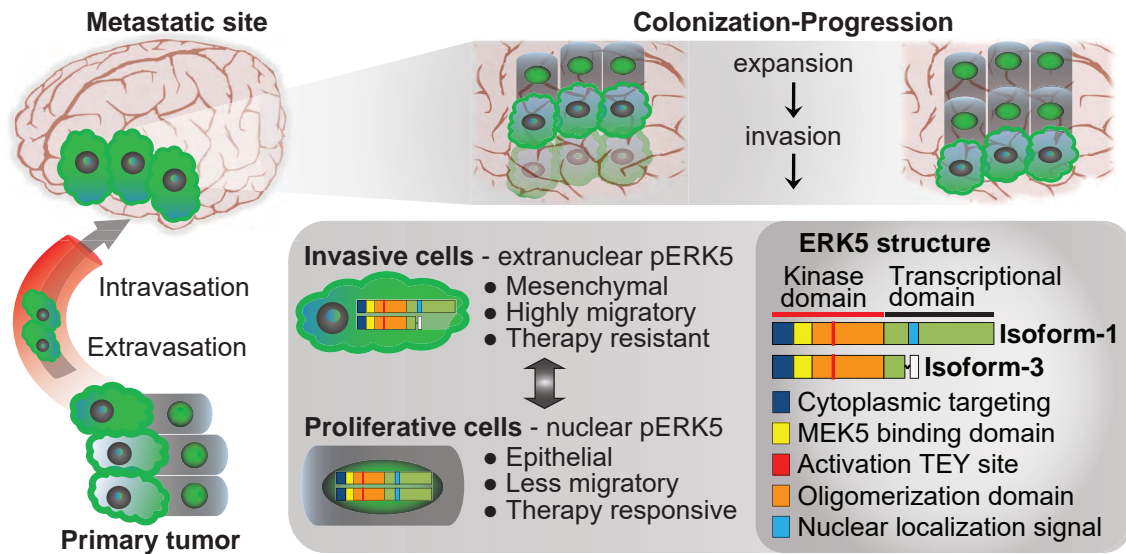

43 ERK5 isoform-3 expression deploys active ERK5 (pERK5) outside the nucleus to facilitate EMT  
44 and cell migration. In cells dominantly expressing isoform-1, pERK5 shuttles to the nucleus to  
45 drive cell expansion.

## 46 **Background**

47 ERK5, also known as the big mitogen kinase 1 (BMK1) or MAPK7, is activated via the upstream  
48 kinase MEK5 by various exogenous stimuli, including growth factors, cytokines and local  
49 stresses. Mechanistically, it regulates processes involved in tumor growth, differentiation and  
50 microenvironmental adaptation, including adhesion, cytoskeleton organization, epithelial-  
51 to-mesenchymal transition (EMT) and cancer-associated inflammation [1-8]. ERK5 activation  
52 has been implicated in proliferation, metastasis and drug resistance in melanoma, colon,  
53 prostate, ovarian, pancreatic, liver and lung carcinomas [9-15]. We and others have shown that  
54 ERK5 transcript and protein are overexpressed in aggressive breast cancers (BC), particularly  
55 in triple-negative phenotype breast cancer (TNBC) [16-20]. The involvement of ERK5 in  
56 oncogenic processes across multiple cancer types has spurred interest in therapeutic strategies  
57 targeting ERK5 [21]. So far, it has been unclear how ERK5 achieves different oncogenic  
58 outcomes with such multifaceted roles as a convergent signal transducer.

59 In this study, we describe variable subcellular localizations of active phosphorylated-ERK5  
60 (pERK5) in BC patient samples, which associated with different clinicopathological features and  
61 patient survival. We found that the variable subcellular localization of pERK5 is regulated by  
62 shorter isoforms of ERK5 which are produced by splice variants expressed in breast and other  
63 cancers. The expression of one isoform in particular, isoform-3, increases the accumulation of  
64 pERK5 outside the nucleus and cell migration, and causes tamoxifen resistance. The expression  
65 of isoform-3 drives EMT *in vitro* and associates with high levels of EMT and poorer survival  
66 across several cancer types. Our studies suggest a model of pERK5 nucleocytoplasmic shuttling  
67 driven by isoform-3 during BC metastasis, which has implications on the use of ERK5 as a  
68 biomarker and a therapeutic target.

## 69 **Methods**

### 70 **Breast cancer cell culture**

71 Breast cancer cell lines were obtained from ATCC™, cultured as per their instructions and were  
72 tested for mycoplasma and authenticated using STR profiling. The 4T1.2 cell line was a gift from  
73 Dr Cameron Johnstone (Monash University, Melbourne, Australia). For genetic depletion studies,  
74 ERK5 was silenced with human or mouse shRNAs purchased as pre-cloned in the pLKO.1-puro  
75 plasmid (MISSION® shRNA, Sigma-Aldrich, St Louis, MO, USA). Control shRNAs in the same  
76 plasmid were also purchased (Sigma). The IDs for the ERK5 shRNAs used are:  
77 TRCN0000001356 and TRCN0000010262 for human, TRCN0000023236 and  
78 TRCN0000232396 for mouse. Stable cell lines with ERK5 knockdown were generated by  
79 selection with puromycin (Sigma) at a concentration of 1 µg/mL for MDA-MB-231 cells and  
80 10 µg/mL for 4T1.2 cells.

### 81 ***In vivo* models**

82 The animal ethics committee at QIMR Berghofer gave approval for mouse experiments in this  
83 study (QIMR Berghofer ethics #A1808-606M). For orthotopic models, female NOD/SCID or  
84 BALB/c nude mice at 5 weeks of age (Animal Resources Centre, Perth, Australia) were  
85 inoculated in the mammary fat-pads with MDA-MB-231 cells ( $5 \times 10^6$  per fat pad) or 4T1.2 cells  
86 ( $1 \times 10^6$  per fat pad) in 50 µL of 50:50 (v/v) PBS:Matrigel™ (BD Biosciences, San Jose, CA, USA).  
87 Tumor growth was measured twice weekly by caliper measurements and weekly bioluminescent  
88 imaging (125 mg/kg luciferin I.P.) with the Xenogen IVIS system (Perkin Elmer, Waltham, MA,  
89 USA). For spontaneous metastasis in the MDA-MB-231 and 4T1.2 models, tumors were  
90 resected from the mammary gland when they reached 250 mm<sup>3</sup> or 150 mm<sup>3</sup>, respectively. After  
91 tumor resection, metastases were quantified using weekly bioluminescence imaging as  
92 described above. Metastases in the lungs were detected by Immunohistochemistry (IHC) using  
93 the anti-Vimentin (V9, DAKO; Santa Clara, CA, USA) mAb as per manufacturer instructions.  
94 Resected primary MDA-MB-231 tumors and matched lung metastases were subjected to IHC  
95 staining for active ERK5 (pERK5) using anti-pERK5 antibody (clone #3371, Cell Signaling) at  
96 1:100 dilution (approximately 2 µg/mL final concentration). Antigen retrieval was done using

97 0.01 M sodium citrate buffer pH 6.0 and heating at 125°C for 4 minutes, blocking used donkey  
98 serum, and detection using the MACH1 Detection Kit as per manufacturer instructions (Biocare  
99 Medical, Pacheco, CA, USA).

## 100 **Immunoblotting, and Immunoprecipitation**

101 Whole cell protein lysates were prepared in ice-cold RIPA lysis buffer (1% v/v Triton X-100;  
102 0.5% v/v Sodium Deoxycholate; 0.1% SDS; 150 mM Tris, pH 7.6; 2 mM EDTA; 150 mM NaCl)  
103 supplemented with Roche cOmplete™ Protease Inhibitor Cocktail (Sigma). Lysis was carried out  
104 on cultured cells; no trypsinization was used as it affects ERK5 and its isoforms detection. Cell  
105 fractions were prepared using the Subcellular Protein Fractionation Kit according to  
106 manufacturer instructions (Thermo Fisher Scientific). Immunoblots were probed with different  
107 antibodies: #3371 anti-pERK5 (only works for immunoblotting after immunoprecipitation) and  
108 #3372 anti-ERK5 from Cell Signaling Technology (Danvers, MA, USA); clone 07-507  
109 anti-pERK5 (Millipore); pERK1/2 (Cell Signaling); anti- $\gamma$ -tubulin (Sigma), anti-Lamin B (Thermo  
110 Fisher Scientific). Membranes were developed using secondary antibody HRP conjugates  
111 (Sigma), visualized using ImageQuant LAS 500 (GE Healthcare, Chicago, IL, US) then  
112 quantified relatively to loading controls by optical density using ImageJ (V1.46d, NIH). For  
113 immunoprecipitation (IP) assays, lysates were incubated with Co-IP Dynabeads™ (Invitrogen)  
114 conjugated to anti-pERK5 antibody (Cell Signaling) or a rabbit IgG control (Merck Millipore) and  
115 used for IP as per manufacturer instructions (Invitrogen).

## 116 **Immunofluorescence**

117 For 2D cultures, cells ( $1 \times 10^6$ ) were seeded onto 18-mm glass coverslips coated with  
118 poly-L-Lysine (Sigma), then washed in PBS 48h later, fixed with cold 4% paraformaldehyde for  
119 10 minutes at RT and permeabilized with 0.1% Triton X-100 for 15 minutes at room temperature  
120 (RT). Cells were blocked with 3% BSA in PBS, incubated at 4°C overnight with primary  
121 antibodies in PBS with 3% BSA: rabbit anti-pERK5 antibody (Cell Signaling) at 1:14 dilution  
122 (15  $\mu$ g/mL) or 15  $\mu$ g/mL rabbit IgG control (Merck Millipore), and mouse anti- $\alpha$ -tubulin (Sigma,  
123 clone DM1A at 1:500). Cells were then incubated with the appropriate Alexa Fluor-conjugated  
124 secondary antibodies (2  $\mu$ g/mL) for 60 minutes at RT. Alexa Fluor™ 555 Phalloidin (Invitrogen)

125 for 1 hour at RT was used instead of anti- $\alpha$ -tubulin staining antibody in selected experiments as  
126 indicated. Stained cells were then washed, counterstained with 4',6'-diamidino-2-phenylindole  
127 (DAPI) and mounted for microscopy using the Zeiss 780-NLO Point Scanning Confocal  
128 microscope (Zeiss, Oberkochen, Germany). CellProfiler [22] (v2.2.0) was used to determine the  
129 extranuclear and nuclear pERK5 staining intensities. Briefly, segmentation of nuclei (based on  
130 DAPI) and cell boundaries (based on tubulin) was used to identify the cytoplasm (between the  
131 nuclei and cell boundary outlines). This segmentation was used to quantify the green  
132 fluorescence intensity for pERK5 in the cytoplasm/membrane and nucleus associated with each  
133 nucleus (DAPI), thus determining the ratio of extranuclear to nuclear pERK5 localization. For 3D  
134 cultures, spheroids were fixed with 4% paraformaldehyde (30 min at room temperature) in the  
135 microwells on day 14, washed with PBS without disturbing the spheroids, adding 2% agarose gel  
136 to seal, and processed into paraffin. Once embedded, samples were sectioned and  
137 immunostained with the standard Tyramide Signal Amplification (TSA) protocol (Perkin Elmer).  
138 Antibodies and conditions used are detailed in **Table S10**. Imaging was done using the Zeiss  
139 AxioSkop2 (Zeiss). CellProfiler was used to determine the fluorescence intensity of the detected  
140 proteins after segmentation of nuclei (based on DAPI) to identify each cell.

#### 141 **TCGA transcript specific expression analysis**

142 The breast cancer TCGA RNA-seq data was mapped for expression of the 18 *ERK5* transcripts.  
143 Briefly, the raw sequencing data was obtained from Cancer Genomics Hub. We then mapped  
144 the data against GENCODE gene model (release 24) including 18 *ERK5* transcripts using STAR  
145 (version 2.4.2a) and quantified the expression using RSEM (version 1.2.25). The pan-cancer  
146 TCGA RNA-seq data (transcript expression RSEM-FPKM) was analyzed using the UCSC Xena  
147 platform (<http://xena.ucsc.edu/>) for the expression of the 18 *ERK5* transcripts. Briefly, the TCGA  
148 pan-cancer transcript expression RNA-seq (TOIL RSEM FPKM) data was loaded into the UCSC  
149 Xena platform and analyzed for all *ERK5* gene (*MAPK7*) transcripts (32 cancer types after  
150 excluding acute myeloid leukemia based on our focus on solid cancers).

#### 151 **Exogenous expression of three main ERK5 isoforms in MCF7 BC cells**

152 ERK5 cDNAs were purchased from GenScript® (Nanjing, China) in pcDNA3.1(+) plasmids;

153 Isoform-1 (Clone ID: OHu26794 - Human MAPK7, NM\_139033.2), Isoform-2 (Clone ID:  
154 OHu27354 - Human MAPK7, NM\_139032.2), and Isoform-3 (custom clone based on Ensembl  
155 transcript ENST00000490660.2, sequence from ATG start at bp 10 to TGA stop at bp 1611).  
156 Utilizing a series of standard molecular cloning techniques including PCR, restriction digestion,  
157 ligation and plasmid isolation, the cDNA sequence of ERK5 isoforms were cloned into  
158 pLVX-Puro plasmid (Clontech Laboratories, Mountain View, CA, USA). Plasmids were  
159 sequenced to confirm the presence of correct cDNA sequences at the 3'-end of the CMV  
160 promoter (data not shown). Lentiviral particles were prepared from HEK293T transfected using  
161 Lipofectamine-3000<sup>®</sup> (Invitrogen) with plasmids (i.e. pLVX-ERK5-Iso1, pLVX-ERK5-Iso2, and  
162 pLVX-ERK5-Iso3). Supernatants were collected on days 3, 5 and 7, purified and concentrated  
163 using the PEG Virus Precipitation Kit (Abcam, Cambridge, UK). Stable MCF7 cell lines infected  
164 with the ERK5 cDNA lentiviral particles were generated by selection in medium containing  
165 puromycin at a concentration of 1  $\mu$ g/mL (Sigma). PCR using primers (**Table S3**) specific for  
166 endogenous or ectopic ERK5 isoform-3 transcripts were used to differentiate isoform-3  
167 expression in BC cells and confirm the expression of ERK5 isoforms cDNAs in MCF7 cells.

### 168 **Cell migration and motility assays**

169 Real time cell motility assays were carried out using the HoloMonitor<sup>®</sup> M4 system (PHI, Lund  
170 Sweden) as per manufacturer instructions; 25-28 cells were tracked over 48 hours. Real time  
171 migration assays were performed using the xCELLigence system (CIM-Plate<sup>®</sup>; ACEA  
172 Biosciences Inc., San Diego, CA, USA). To promote cell migration, 20% serum and 100 nM  
173 estradiol (E2) were used as a chemoattractant in the base of the CIM-Plates.

### 174 **TGF $\beta$ -induced MCF7 model**

175 For TGF $\beta$  induction, MCF7 cells were cultured in 2D in the absence or presence of 10 ng/mL  
176 human TGF $\beta$  (PeproTech<sup>®</sup>, Rocky Hill, NJ, USA) for 3 weeks where TGF $\beta$  was replenished  
177 every 2 days, and 1 hour before collection for subsequent use. Spheroids were prepared from  
178 control MCF7-EV or MCF7-Iso3 cells, without or with TGF $\beta$  induction, using microwell devices.  
179 The microwell devices, with well diameter of 600  $\mu$ m, were made as previously described [23]  
180 and were equilibrated with cell culture medium for 30 min before cell seeding. Cells were seeded



181 at  $2.5 \times 10^5$  per microwell and incubated for 14 days to enable the formation of dense multicellular  
182 spheroids. Media was replenished every 2 days. Spheroid growth was monitored by  
183 phase-contrast imaging on the EVOS XL Core Cell Imaging System (Thermo Fisher Scientific,  
184 Waltham, MA, USA) on days 2, 7, 11 and 14 and sphere area was measured using ImageJ.  
185 Spheroids were also collected on day 14 for subsequent assays.

### 186 **Tamoxifen dose-response assays**

187 In 2D assays, cells were seeded in 24-well plates ( $4 \times 10^4$ /well) then incubated for 72 hours in the  
188 presence of tamoxifen (0-10  $\mu$ M, Sigma). Cell growth in the absence or presence of tamoxifen  
189 was monitored (every 2 hours) using the IncuCyte Zoom live content imaging from Essen  
190 Bioscience (MI, USA). Cell growth was measured by the IncuCyte analysis software. For 3D  
191 assays, treatment with 10  $\mu$ M tamoxifen was initiated two days after forming spheroids and  
192 tamoxifen was replenished every 2 days. Spheroid growth was monitored using phase-contrast  
193 imaging as described earlier and size (area) was measured using ImageJ.

### 194 **Epithelial to Mesenchymal Transition (EMT) array and validation**

195 The EMT RT<sup>2</sup> Profiler PCR Arrays (PAHS-090Z, QIAGEN; Hilden, Germany) were used to  
196 profile control (EV) and isoform-3 expressing MCF7 cells grown as 2D cultures in the absence  
197 or presence of TGF $\beta$ . Arrays were carried out in technical duplicates. Standard RT-PCR using  
198 independent sets of Predesigned KiCqStart<sup>®</sup> SYBR<sup>®</sup> Green Primers (Sigma, **Table S11**) was  
199 carried out for validation with independent biological replicates from 2D cultures (n = 2) or 3D  
200 cultures (duplicates from 25 spheres per replicate). The EMT arrays and subsequent validations  
201 were performed on ViiA7 RT-qPCR System (Invitrogen).

### 202 **Breast cancer cohorts and pERK5 staining**

203 Institutional and local hospital human research ethics committees approved the study (University  
204 of Queensland ethics #2005000785 and the Royal Brisbane Women's and Children Hospital  
205 ethics #2005/022). Informed consent was obtained for all studies on cancer tissues. BC Tissue  
206 microarrays (TMAs) were stained with anti-pERK5 antibody (clone #3371). TMAs were  
207 constructed from the follow-up cohort (Queensland Follow Up cohort, QFU cohort) and

208 metastatic breast cancer (MBC) cohorts as described previously [24-27] (**Tables S6-8**). Briefly,  
209 4  $\mu$ m sections on Superfrost Plus slides were dewaxed prior to heat antigen retrieval using  
210 0.01 M sodium citrate buffer pH 6.0 in Biocare Medical Decloaker (Biocare Medical) at 125°C for  
211 4 minutes. Endogenous peroxidases were blocked with 1% hydrogen peroxidase for 5 minutes,  
212 and non-specific background staining was blocked with Background Sniper (Biocare Medical) for  
213 10 minutes. Slides were incubated with anti-pERK5 antibody at 1:175 dilution (approximately  
214 1.2  $\mu$ g/mL final concentration) for 1 hour at RT, followed by 30 minutes with MACH1 Universal  
215 HRP-Polymer and detected using the MACH1 Detection Kit (Biocare Medical). Slides were  
216 counterstained with Mayer's Hematoxylin for 1 minute as per the standard protocol.

### 217 **Statistical Analysis**

218 All statistical analysis was performed using GraphPad Prism® (v.7, GraphPad Software). The  
219 types of tests performed are indicated in respective Figure legends.

## 220 Results

### 221 Subcellular localization of pERK5 during metastasis and cell migration

222 Consistent with previous reports [16, 19, 28], *ERK5* depletion via stable expression of shRNAs  
223 had no effect on primary tumor formation or growth but inhibited spontaneous metastasis in two  
224 TNBC models; the MDA-MB-231 (MDA231) human xenograft and the 4T1.2 syngeneic mouse  
225 models (**Figure S1A-C**). Immunohistochemistry against vimentin in the MDA231 model  
226 confirmed the lack of lung metastases from tumors with *ERK5* depletion (**Figure 1A**). To study  
227 the localization of signaling-active ERK5 (pERK5), defined by phosphorylation of the TEY motif  
228 on Thr218/Tyr220, we first evaluated the specificity of antibodies against pERK5. The specificity  
229 of the pERK5 antibody from Cell Signaling Technology (product #3371) was confirmed by  
230 immunoprecipitation (detailed in **Additional File 1**) and immunofluorescence assays using  
231 *ERK5*-depleted cells as positive controls (**Figure 1B**). Interestingly, pERK5 was predominantly  
232 detected in the cytoplasm and the membrane (extranuclear) in the invasive MDA231 and 4T1.2  
233 TNBC cells, whereas pERK5 was mainly nuclear in the less invasive estrogen receptor-positive  
234 (ER+) MCF7 cells (**Additional File 1**). In primary MDA231 tumors, we observed extranuclear  
235 pERK5 at the leading edge, while nuclear pERK5 predominated in the tumor interior and the  
236 spontaneous lung metastases (**Figure 1C**). We also observed a significant increase in  
237 extranuclear pERK5 in migrating MDA231 and 4T1.2 cells (**Figure 1D**), further suggesting a role  
238 of the subcellular localization of pERK5 in cancer cell migration and metastasis.

### 239 ERK5 splice variants are expressed and activated in breast cancer

240 During the validation of the antibodies against pERK5, we observed three protein bands that  
241 were detected by an anti-ERK5 antibody after immunoprecipitation with two different pERK5  
242 antibodies. These bands were also detected with anti-pERK5 antibody after immunoprecipitation  
243 with another anti-pERK5 antibody, but not with an anti-pERK1/2 antibody, confirming they are  
244 ERK5 proteins (**Additional File 1**). Interestingly, immunoblotting of extranuclear (cytoplasm and  
245 membrane) and nuclear fractions of MDA231 and 4T1.2 cells revealed that the three pERK5  
246 bands had different subcellular distribution (**Figure 2A**). Based on similarities to mouse ERK5  
247 isoforms [29, 30], the three bands we observed correspond to possible human ERK5 isoforms

248 which have not been previously characterized. The three isoforms include: isoform-1 (full-length  
249 ERK5, Q13164-1) at ~115 kDa, isoform-2 (N-terminal truncated, Q13164-2) at ~100 kDa, and  
250 isoform-3 (C-terminal truncated, Q13164-3) at ~60 kDa.

251 To further characterize the possible ERK5 isoforms and their phosphorylation, subcellular  
252 fractions from MDA231 cells were used for immunoprecipitation (IP) with anti-pERK5 antibody  
253 before immunoblotting (IB) with an antibody against total ERK5 protein. ERK5 isoform-1  
254 (full-length) was mainly detected in the extranuclear fraction in the input, whereas pERK5  
255 isoform-1 distributed equally in the extranuclear and nuclear fractions (**Figure 2B** IP lanes).  
256 ERK5 isoform-3 was detected in the nuclear fraction (**Figure 2B** nuclear input), but its activated  
257 form (pERK5 isoform-3) was mainly in the extranuclear fraction (**Figure 2B** extranuclear IP). It is  
258 noteworthy that higher levels of phosphorylated isoform-3 than isoform-1 were detected by IP  
259 and IB (**Figure 2A-B**), suggesting that isoform-3 is preferentially activated. This is in line with  
260 previous biochemical studies which showed that gradual deletion of the C-terminal domain of  
261 ERK5 facilitates its activation, and significantly enhances its kinase activity [31]. Isoform-2 was  
262 weakly phosphorylated and present in the nuclear fraction (**Figure 2A-B**). We confirmed the  
263 authenticity of the pERK5 isoforms by re-probing the same blots with an antibody against  
264 pERK1/2 which did not detect pERK1/2 after pERK5 IP (**Figure 2B** IB: pERK1/2).

265 To explore the expression of ERK5 isoforms in BC, we mapped the eighteen human *ERK5*  
266 transcript variants annotated in Ensembl in The Cancer Genome Atlas (TCGA) RNA-Seq data  
267 (**Tables S1-S2**). Thirteen transcripts encoding short variants of *ERK5* had very low expression  
268 in BC (average z-score < 0, **Figure S2**). The remaining 5 transcripts (**Figure 2C**) include: three  
269 variants that differ in the 3'UTR and encode full-length, isoform-1 (Q13164-1, transcripts  
270 *MAPK7-202*, *MAPK7-203* and *MAPK7-204*), a variant encoding the N-terminal truncated  
271 isoform-2 (Q13164-2, transcript *MAPK7-201*) and an intron-retaining transcript that produces the  
272 C-terminal truncated isoform-3 (Q13164-3, transcript *MAPK7-208*). These variants were  
273 frequently expressed in BC (**Figure 2D**), particularly in the TN/basal-like BC (**Figure 2E**).

## 274 **ERK5 isoform-3 regulates the subcellular distribution of active pERK5**

275 Mouse ERK5 isoforms with N-terminal truncation, which are similar to the human ERK5  
276 isoform-2, are localized in the cell nucleus [29]. The mouse ERK5 with C-terminal truncation  
277 (ERK5-T), which is similar to the human ERK5 isoform-3, binds to itself and to the full length  
278 mouse ERK5 but does not translocate to the nucleus upon activation, thus causing the retention  
279 of active mouse ERK5 in the cytoplasm [30]. To test how each of the human isoforms may  
280 modulate the subcellular localization of pERK5, we used the MCF7 cells as they express low  
281 levels of endogenous isoforms 2 and 3 (**Figure 3A** and **Figure S3A-D**). Ectopic expression of  
282 isoform-1 or isoform-3, but not isoform-2, increased extranuclear levels of pERK5 (**Figure 3B**).  
283 Estradiol (E2) is an inducer of ERK5 phosphorylation and nuclear translocation of pERK5 in ER+  
284 cells [32], so we tested its effects in the MCF7 cell lines. E2 treatment induced nuclear  
286 translocation of pERK5 in isoforms 1 and 2, but not in isoform-3 expressing cells (**Figure 3B-C**,  
287 **Figure S3E**), indicating that isoform-3 retains pERK5 outside the nucleus even in the presence  
288 of E2. Isoform-3 promoted cell migration, motility and tamoxifen resistance in MCF7 cells  
289 (**Figure 3D-F**, **Figure S3F**).

## 290 **Co-expression of ERK5 splice isoforms 1 and 3 associates with poor cancer survival**

291 Having found that proportionally high expression of isoform-3 promoted extranuclear ERK5  
292 activity and led to an invasive phenotype, we investigated the potential clinical relevance of  
293 ERK5 isoforms in solid cancers. The TCGA Pan-Cancer RNA-seq data from 32 solid cancer  
294 types (n = 9,459 cases, **Table S4**) showed that all protein-coding isoforms were detectable  
295 across the different cancer types (**Figure 4A**). Higher expression of isoform-1 and isoform-3, or  
296 their combination associated with poor survival, whereas the expression of isoform-2 did not  
297 associate with survival (**Figure 4B**). Higher co-expression of isoforms 1 and 3 associated with a  
298 shift from an epithelial to a mesenchymal state (EMT score, **Figure 4C**), suggesting a role of this  
299 co-expression in EMT (**Figure S4B**). Since high co-expression of isoforms 1 and 3 was detected  
300 in most cancer types, the association of this co-expression with poorer survival and EMT was not  
301 driven by bias in particular, poor prognosis cancer types (**Figure S4C**).

## 302 **Co-expression of ERK5 isoforms 1 and 3 drives epithelial-to-mesenchymal transition**

303 To test whether the co-expression of isoforms 1 and 3 of ERK5 can drive EMT *in vitro*, we used  
304 the MCF7-Iso3 cells which co-express ERK5 isoforms 1 and 3 as model and compared them to  
305 the MCF7-Empty vector (EV) cells that predominantly express endogenous isoform-1. Under  
306 basal and TGF $\beta$ -induced conditions, isoform-3 expression led to higher extranuclear pERK5  
307 localization (**Figure 5A**). We profiled these cells using an 84-gene EMT panel (**Table S6** and  
308 **Figure S5A**; 73 genes showed expression; 11 genes were not detected). Overall, MCF7-Iso3  
309 overexpressing cells showed significant deregulation of this EMT gene-panel compared to  
310 MCF7-EV cells, without or with TGF $\beta$  (**Table S6**). To investigate the clinical relevance of this *in*  
311 *vitro* profiling, we analyzed the association of the EMT gene-panel with the co-expression of  
312 isoforms 1 and 3 in the TCGA Pan-Cancer RNA-seq data. Of the 70 genes from the EMT panel  
313 which associated significantly with the co-expression of isoforms 1 and 3 in the TCGA data, 39  
314 genes (56%) were affected by the co-expression of isoform 1 and 3 in the MCF7-Iso3 cells with  
315 or without TGF $\beta$  induction (**Figure S5B**). We selected 17 of these 39 genes for validation and  
316 found that 15 genes (88%) were indeed significantly regulated by the co-expression under basal  
317 or TGF $\beta$ -induced conditions (**Figure 5B**). As EMT is implicated in tamoxifen resistance, we also  
318 tested the response of MCF7-EV and MCF7-Iso3 spheroids to tamoxifen. Both in the absence or  
319 presence of TGF $\beta$ , MCF7-Iso3 spheroids showed significantly lower response to tamoxifen than  
320 MCF7-EV spheroids (**Figure 5C**). The MCF7-Iso3 spheroids showed a loss of membrane  
321 staining for epithelial cytokeratin 19 (CK19), E-cadherin and  $\beta$ -catenin, gained expression of  
322 basal cytokeratin 5 (CK5), and were enriched for SOX2 positive nuclei (**Figure 5D-E**). The  
323 MCF7-Iso3 spheroids, compared to MCF7-EV spheroids, had significantly higher mRNA levels  
324 of EMT-related transcription factors (*FOXC2*, *TWIST1*, and *SNAI2*) and extracellular matrix  
325 (ECM)-related genes (*SPARC*, *COL5A2* and *KRT14*) (**Figure S5C**).

## 326 **ERK5 activation and extranuclear localization is associated with poor patient survival**

327 The subcellular localization of pERK5 was investigated in a large cohort of primary breast  
328 tumors sampled in tissue microarrays (TMAs) with detailed clinicopathologic annotation,  
329 including survival outcomes up to 30 years post-diagnosis (the QFU cohort) [24-27]. pERK5 was

330 observed in the nucleus, membrane and cytoplasm of tumor cells (**Figure 6A, Tables S6-S7**).  
331 Membrane (M) and cytoplasmic (C) staining were highly correlated (Pearson correlation  
332 p-values = 8.2E-8), so these scores were combined (MC, or extranuclear). Strong extranuclear  
333 staining (MC2) associated with poor patient survival irrespective of BC subtype or nuclear  
334 co-expression (**Figure 6B, Figure S6B**). Nuclear pERK5 staining (N) associated with favorable  
335 survival (**Figure 6C, Figure S6B**), particularly in ER+ cases (**Figure S6C**).

336 To further examine the clinical relevance of this distribution, and because the nuclear and  
337 extranuclear pERK5 staining were not mutually exclusive (**Figure S6D**), we categorized the QFU  
338 cases according to the relative 'doses' of nuclear and extranuclear pERK5. The consolidated  
339 patterns included negative extranuclear and nuclear staining (Category-A, Cat-A), positive  
340 nuclear staining without strong extranuclear staining (Category-B, Cat-B), strong nuclear  
341 staining without strong extranuclear staining (Category-C, Cat-C), and strongly positive for  
342 extranuclear pERK5 irrespective of nuclear staining. (Category-D, Cat-D). Tumors with  
343 abundant extranuclear pERK5 (Cat-D) were generally larger with high histological grade and  
344 more frequent lymph node metastases (**Figure 6D**) - hallmarks of aggressive clinical behavior.  
345 This category was enriched for HER2+ and TNBC cases, with frequent expression or markers of  
346 primitive, mesenchymal state (vimentin) and/or aggressive behavior [33, 34]. In contrast, nuclear  
347 pERK5 (Cat-C) was inversely associated with tumor size, lymph node metastasis and TNBC  
348 status.

349 We validated our findings in an independent metastatic breast cancer cohort (MBC; n = 285,  
350 **Table S9**) comprising 70 primary breast tumors and 215 metastases from brain, gynecological  
351 and other sites sampled in TMAs. Compared to the cross-sectional QFU cases, metastatic BC  
352 (MBC) tumors exhibited higher expression of pERK5 in all three cell compartments (**Figure S6E**).  
353 Nuclear pERK5 was significantly higher in metastases (**Figure 6E**). Extranuclear pERK5 was  
354 higher in MBC and metastases compared to cross-sectional QFU cases but was lower in  
355 metastases compared to their matching MBC (**Figure 6F**).

356 In summary, primary metastatic BC and metastases showed higher frequency of both  
357 Category-D (strong extranuclear pERK5) and Category-C (strong nuclear pERK5) cells  
358 compared to cross-sectional QFU cases (**Figure 6G**). These cell types also distributed  
359 differently at the metastatic sites compared to their matched primary tumors (**Figure 6G**),  
360 increased category-C and decreased category-D, suggesting that pERK5 is redistributed during  
361 metastatic colonization.

## 362 **Discussion**

363 This study found that human *ERK5* splice variants encoding short protein isoforms are  
364 expressed and are functional in cancer. Generic suppression of all isoforms inhibited metastasis  
365 in mouse models of BC. Higher expression of ERK5 isoform-3 promoted activation in the cytosol,  
367 drove EMT and cell migration; while dominant expression of full-length ERK5, isoform-1, favors  
368 nuclear activity and epithelial-like differentiation. In general, our study supports ongoing  
369 development of ERK5-targeting agents, but also underscores its regulatory and functional  
370 complexity, thus exemplifies how this could stifle preclinical or clinical approaches that fail to  
371 account for ERK5 isoform-specific effects.

372 The N-terminal half of ERK5 (kinase domain, residues 1-407) binds to its C-terminus  
373 (transcriptional domain, residues 407-806), closed conformation, for nuclear export and this  
378 interaction dissociates upon TEY motif phosphorylation, open conformation, leading to nuclear  
379 translocation [35]. Independent of their phosphorylation status, ERK5 molecules exists as  
380 oligomers via the oligomerization domain (residues 140- 406) [29]. A C-terminal deletion  
381 construct (residues 1-407), which lacks the nuclear localization signal and is similar to the  
382 naturally expressed isoform-3 (residues 1-553), localizes to both the nucleus and cytoplasm [35].  
383 We found that isoform-3 localizes to the nucleus and cytoplasm, but the cytoplasmic pool was  
384 highly phosphorylated. The ERK5 C-terminus was shown to reduce the phosphorylation and  
385 kinase activity of its N-terminal half in a self-regulatory mechanism [31]. In agreement, we found  
386 high levels of phosphorylated isoform-3 in TNBC cells and was immunoprecipitated by  
387 anti-pERK5 antibody more efficiently than full-length ERK5.



388 Accumulating evidence [36] is challenging the classic linear model where ERK5 is simply  
389 translocated to nucleus upon activation by MEK5. Madak-Erdogan et al. [32] described that  
390 pERK5 is retained in the cytoplasm of ER- BC cells but shuttled to the nucleus in ER+ cells to  
391 drive ER-mediated transcription. This group also implicated nucleocytoplasmic transport  
392 machinery, particularly XPO1, in the extranuclear retention of pERK5 and tamoxifen resistance  
393 in ER+ cells. Inhibition of XPO1 redistributes pERK5 to the nucleus and restores tamoxifen  
394 sensitivity [37]. Our studies now clarify that this may occur in the context of proportionally high  
395 expression of isoform-3, a common context in several cancer types. Importantly, while nuclear  
396 localization of pERK5 was associated with ER positivity, our studies in BC cohorts showed that  
397 nuclear and extranuclear pERK5 are not mutually exclusive, and that a proportion of ER+ BC  
398 displayed extranuclear pERK5 staining. Extranuclear pERK5 associated with metastatic primary  
399 tumors and poorer survival irrespective of ER status.

400 Serendipitously, the previous biochemical studies [31] showing higher activating  
401 autophosphorylation and kinase activity of C-terminal deletion constructs of ERK5 may explain  
402 the pathogenic nature of the similar, naturally expressed isoform-3 of ERK5. Studies from  
403 murine cells suggested that regulation of ERK5 signaling may be mediated at the level of RNA  
404 processing which produce mouse ERK5 isoforms [29, 30], similar to the human isoforms in our  
405 study. Mouse ERK5-T, which is similar to human isoform-3, heterodimerizes with full-length  
406 mouse ERK5 irrespective of phosphorylation status, and inhibits nuclear translocation of pERK5  
407 [30]. Again, biochemical studies found that unlike full-length human ERK5, a C-terminal deletion  
408 construct (residues 1-490) remains in a cytosolic complex with Cdc37-Hsp90 $\beta$  even after ERK5  
409 activation [38]. Here, we show that the balance of expressed *ERK5* splice variants is integral to  
410 the phenotypic and functional requirements of cancer cells during progression and metastasis.  
411 Expression of ERK5 isoform-3 in cancer associates with a mesenchymal state, metastasis and  
412 poor patient survival. Experimentally, we show that exogenous expression of isoform-3  
413 facilitated cell migration and tamoxifen-resistance. These phenotypes were paralleled with  
414 extranuclear accumulation of pERK5 under unstimulated, estrogen- or TGF $\beta$ -induced conditions.  
415 Mechanistically, the expression of isoform-3 induced EMT characterized by loss of epithelial

416 markers and gain of basal, mesenchymal markers. Isoform-3 increased the expression of  
417 EMT-related transcription factors and EMT/ECM-related genes, specifically the  
418 *SPARC-FOXC2-SNAI2-TWIST1* EMT-axis in 2D and 3D cell cultures. This axis was further  
419 upregulated in isoform-3 expressing cells under TGF $\beta$ -induced conditions.

420 ERK5 promotes Src-induced podosome formation and cell invasion [2], interacts with actin  
421 organizing proteins fascin (within the Cdc37-Hsp90 $\beta$  complex) [38] and cofilin [32], which are  
422 also associated with aggressive BC [39, 40], and is important for cell migration and metastasis  
423 as reported in our study and others [16, 19, 28, 32]. In contrast to these extranuclear activities,  
424 nuclear pERK5 drives a distinct functional program by promoting transcription of genes required  
425 for proliferation, while suppressing those involved in immunogenicity and apoptosis [32]. Our  
426 studies suggest a model that reconciles these findings, where alternative splicing maintains  
427 ERK5 localization and activation in dynamic equilibrium depending on requirements dictated by  
428 the microenvironment. For example, stimuli like hypoxia, growth factors or vascular sheer stress  
429 may exploit the activation-susceptible isoform-3, being in open conformation and without the  
430 self-regulatory C-terminus, or by promoting the expression of isoform-3, to facilitate invasion and  
440 migration. Once such stimuli wane, isoform-3 expression or phosphorylation levels regress, and  
441 nuclear functions are restored. This model may also resolve conflicting reports on the role of  
442 ERK5 in EMT [19, 28, 41-46], which have not addressed the distinctive expression or the  
443 contribution of isoform-3 to EMT. Importantly, our data will inform the development of rational  
444 therapeutic strategies targeting ERK5, allowing due consideration of its complex regulation,  
445 structure and context-dependent biological functions.

446 The results in this study and the model for a dynamic equilibrium of ERK5 localization and  
447 activation through its alternative splicing raise several biological and clinical questions for future  
448 studies. The molecular and the environmental queues that may modulate the expression of  
449 isoform-3, and the co-expression of isoform-3 with isoform-1 remain unknown. In addition to the  
450 association of increasing levels of isoforms 1 and 3 co-expression with increasing EMT scores  
451 and patient deaths, we should note that the highly metastatic 4T1.2 mouse cells express a  
452 higher ratio of phosphorylated isoform-3 to phosphorylated isoform-1 than the relatively less

453 metastatic MDA-MB-231 cells. Thus, further studies are needed to determine the relative  
454 expression of isoform-3 to isoform-1 that is required to drive metastasis *in vivo*. Similarly,  
455 whether the expression of isoform-3 alone, in the absence of full-length ERK5, can drive EMT  
456 and metastasis is worth further study. Moreover, while we characterized EMT-related markers,  
457 the exact mechanism behind the EMT changes driven by the exogenous expression of isoform-3  
458 with endogenously expressed isoform-1 in MCF7 cells is unknown. The interaction of ERK5 with  
459 cytoskeletal reorganizing fascin [38] and cofilin [32] may be enhanced when isoform-3 is  
460 expressed. Since ERK5 exists as an oligomer, both in the inactive and active states, it will be  
461 important to compare homogenous oligomers of ERK5 (isoform-1 oligomers vs. isoform-3  
462 oligomers) and heterogenous oligomers (isoform-1/isoform-3 oligomers) for their interactions  
463 with other cellular proteins. Different ERK5 oligomers may have different interactors and  
464 downstream effectors. Also relevant here is that isoform-3 lacks the C-terminal domain and it  
465 has been shown that C-terminal deletion constructs of ERK5 increases the activating  
466 autophosphorylation and activity of ERK5 [31]. We observed strong activation of isoform-3  
467 compared to isoform-1 in MDA-MB-231 and 4T1.2 cells and immunoprecipitation of pERK5 in  
468 the isoform-3 form was more efficient. These observations have implications on the biology of  
469 ERK5 and raise the question if current ERK5 inhibitors are efficient against isoform-3 activation  
470 or its function.

## 471 **Conclusion**

472 We found that the subcellular distribution of signaling-active ERK5 protein (pERK5) associates  
473 with different clinical outcomes in breast cancer and is modulated by a shorter isoform of ERK5.  
474 Isoform-3 particularly is activated and retains active pERK5 outside the nucleus, which drives an  
478 aggressive mesenchymal state, cell migration and tamoxifen-resistance in breast cancer cells.  
479 The expression of isoform-3 of ERK5 in cancer patients associates with an aggressive  
480 mesenchymal state and poor patient survival. Our study elucidates that ERK5 targeting  
481 strategies should account for its splicing and context-dependent biological functions.

## 482 **Abbreviations**

- 483 3'UTR: three prime untranslated region
- 484 BC: breast cancer
- 485 DAPI: 4',6'-diamidino-2-phenylindole
- 486 E2: estradiol
- 487 EMT: epithelial-to-mesenchymal transition
- 488 ER+: estrogen receptor-positive
- 489 ERK1/2: extracellular-signal-regulated kinase 1/2
- 490 pERK1/2: phosphorylated extracellular-signal-regulated kinase 1/2
- 491 ERK5: extracellular-signal-regulated kinase 5
- 492 pERK5: phosphorylated extracellular-signal-regulated kinase 5
- 493 HRP: horseradish peroxidase
- 494 IB: immunoblotting
- 495 IF: immunofluorescence
- 496 IHC: immunohistochemistry
- 497 IP: immunoprecipitation
- 498 kDa: kilo dalton
- 499 MBC: metastatic breast cancer
- 500 MEK5: mitogen-activated protein kinase kinase 5
- 501 RNA-seq: RNA sequencing
- 502 RT: room temperature
- 503 RT-PCR: reverse transcription polymerase chain reaction
- 504 shRNA: short hairpin RNA
- 505 TCGA: the cancer genome atlas
- 506 TEY: threonine-glutamate-tyrosine motif
- 507 TGF $\beta$ : transforming growth factor beta
- 508 TMAs: tissue microarrays
- 509 TNBC: triple negative breast cancer
- 510 TSA: tyramide signal amplification
- 511 UCSC: University of California Santa Cruz

## 512 **Declarations**

513 **Ethics approval and consent to participate:** Institutional and local hospital human research  
514 ethics committees approved the study (University of Queensland ethics #2005000785 and the  
515 Royal Brisbane Women's and Children Hospital ethics #2005/022). Informed consent was  
516 obtained for all studies on cancer tissues.

517 **Consent for publication:** Not applicable

518 **Availability of data and materials:** The datasets generated and analyzed in this study are  
519 available in the supplementary tables.

520 **Competing interests:** The authors declare that they have no competing interests.

521 **Funding:** This research was funded by Rio Tinto Ride to Conquer Cancer, RTCC-WEWC15014  
522 to F.A. and the Cancer Council Queensland, APP1106310 to F.A., P.T.S. and J.M.S. F.A. was  
523 supported by Australian Research Council Fellowship (FT130101417). M.M., J.R.S., O.C.,  
524 E.N.R. and H.Y.H. were supported by the Australian National Health and Medical Research  
525 Council (NHMRC Grant APP1082458 to F.A.). M.M. was also supported by University of  
526 Queensland tuition fee stipend during PhD studies (co-supervisors KK.K. and F.A.). Patient  
527 cohorts were funded by NHMRC Program Grants, APP1017028 and APP1113867, to G.C.T,  
528 S.R.L. and KK.K. The APC was funded by Qatar Biomedical Research Institute.

529 **Authors' contributions:** Conceptualization: F.A. and M.M.; methodology: M.M., J.M.S, J.R.K.,  
530 S.A. W.S., T.L., O.C., E.N.R. H.Y.H., A.P.W., M.M.M., F.C., and F.A.; software: M.M., J.M.S.,  
531 J.R.K., M.M.M., J.D.F., S.L.E., W.S., F.C. and F.A.; validation: M.M. and F.A.; formal analysis:  
532 F.A., M.M., J.M.S, J.R.K., A.E.MR., P.T.S., W.S., H.Y.H., A.P.W., F.C., J.S.L., O.C., E.N.R.,  
533 M.M.M., J.D.F. and S.L.E.; investigation: M.M., J.M.S, J.R.K., S.A. W.S., O.C., E.N.R. H.Y.H.,  
534 A.P.W., M.M.M., F.C., and F.A.; resources: F.A., J.M.S, J.R.K., A.E.MR., P.T.S., J.S.L., J.D.F.,  
535 S.L.E., T.L., B.W.D, G.C.T, KK.K. and S.R.L.; data curation: M.M.M., J.D.F., S.L.E., J.M.S,  
536 J.R.K., A.E.MR., P.T.S., S.R.L. and F.A.; writing – original draft: F.A., M.M. and J.M.S.;  
537 writing—review and editing: all authors; visualization: M.M., J.M.S., and F.A.; supervision: F.A.,  
538 P.T.S., S.R.L., J.D.F., S.L.E., J.S.L, B.W.D., G.C.T. KK.K; project administration: F.A.; funding  
539 acquisition: F.A., J.M.S., P.T.S., G.C.T., KK.K. and S.R.L.

540 **Acknowledgements:** We thank the patients who donated samples and the Brisbane BioBank  
541 for collection, annotation and provision of clinical samples for IHC studies. We acknowledge the  
542 support of Metro North Hospital & Health Service in relation to collection of clinical subject data  
543 and materials, and thank the QIMR Berghofer Flow cytometry, Microscopy and Histology  
544 facilities for technical support.

## 545 References

- 546 1. Barros JC, Marshall CJ: Activation of either ERK1/2 or ERK5 MAP kinase pathways can  
547 lead to disruption of the actin cytoskeleton. *J Cell Sci* 2005, 118:1663-1671.
- 548 2. Schramp M, Ying O, Kim TY, Martin GS: ERK5 promotes Src-induced podosome  
549 formation by limiting Rho activation. *J Cell Biol* 2008, 181:1195-1210.
- 550 3. Sawhney RS, Liu W, Brattain MG: A novel role of ERK5 in integrin-mediated cell adhesion  
551 and motility in cancer cells via Fak signaling. *J Cell Physiol* 2009, 219:152-161.
- 552 4. Wilhelmsen K, Mesa KR, Lucero J, Xu F, Hellman J: ERK5 protein promotes, whereas  
553 MEK1 protein differentially regulates, the Toll-like receptor 2 protein-dependent activation  
554 of human endothelial cells and monocytes. *J Biol Chem* 2012, 287:26478-26494.
- 555 5. Finegan KG, Perez-Madrigal D, Hitchin JR, Davies CC, Jordan AM, Tournier C: ERK5 is  
556 a critical mediator of inflammation-driven cancer. *Cancer Res* 2015, 75:742-753.
- 557 6. Song C, Xu Q, Jiang K, Zhou G, Yu X, Wang L, Zhu Y, Fang L, Yu Z, Lee JD, et al:  
558 Inhibition of BMK1 pathway suppresses cancer stem cells through BNIP3 and BNIP3L.  
559 *Oncotarget* 2015, 6:33279-33289.
- 560 7. Williams CA, Fernandez-Alonso R, Wang J, Toth R, Gray NS, Findlay GM: Erk5 Is a Key  
561 Regulator of Naive-Primed Transition and Embryonic Stem Cell Identity. *Cell Rep* 2016,  
562 16:1820-1828.
- 563 8. Hoang VT, Yan TJ, Cavanaugh JE, Flaherty PT, Beckman BS, Burow ME: Oncogenic  
564 signaling of MEK5-ERK5. *Cancer Lett* 2017, 392:51-59.
- 565 9. Sureban SM, May R, Weygant N, Qu D, Chandrakesan P, Bannerman-Menson E, Ali N,  
566 Pantazis P, Westphalen CB, Wang TC, Houchen CW: XMD8-92 inhibits pancreatic tumor  
567 xenograft growth via a DCLK1-dependent mechanism. *Cancer Lett* 2014, 351:151-161.
- 568 10. Dai J, Wang T, Wang W, Zhang S, Liao Y, Chen J: Role of MAPK7 in cell proliferation and  
569 metastasis in ovarian cancer. *International Journal of Clinical and Experimental  
570 Pathology* 2015, 8:10444-10451.
- 571 11. Rovida E, Di Maira G, Tusa I, Cannito S, Paternostro C, Navari N, Vivoli E, Deng X, Gray  
572 NS, Esparis-Ogando A, et al: The mitogen-activated protein kinase ERK5 regulates the  
573 development and growth of hepatocellular carcinoma. *Gut* 2015, 64:1454-1465.
- 574 12. Gavine PR, Wang M, Yu D, Hu E, Huang C, Xia J, Su X, Fan J, Zhang T, Ye Q, et al:  
575 Identification and validation of dysregulated MAPK7 (ERK5) as a novel oncogenic target  
576 in squamous cell lung and esophageal carcinoma. *BMC Cancer* 2015, 15:454.
- 577 13. Pereira DM, Simoes AE, Gomes SE, Castro RE, Carvalho T, Rodrigues CM, Borralho PM:  
578 MEK5/ERK5 signaling inhibition increases colon cancer cell sensitivity to 5-fluorouracil  
579 through a p53-dependent mechanism. *Oncotarget* 2016, 7:34322-34340.
- 580 14. Xiong Y, Zhang L, Wang T: Phosphorylation of BMK1 induces prostatic carcinoma cell  
581 proliferation by promoting entry into the S phase of the cell cycle. *Oncol Lett* 2016,  
582 11:99-104.
- 583 15. Tusa I, Gagliardi S, Tubita A, Pandolfi S, Urso C, Borgognoni L, Wang J, Deng X, Gray  
584 NS, Stecca B, Rovida E: ERK5 is activated by oncogenic BRAF and promotes melanoma  
585 growth. *Oncogene* 2018, 37:2601-2614.

- 586 16. Cronan MR, Nakamura K, Johnson NL, Granger DA, Cuevas BD, Wang JG, Mackman N,  
587 Scott JE, Dohlman HG, Johnson GL: Defining MAP3 kinases required for MDA-MB-231  
588 cell tumor growth and metastasis. *Oncogene* 2012, 31:3889-3900.
- 589 17. Castro NE, Lange CA: Breast tumor kinase and extracellular signal-regulated kinase 5  
590 mediate Met receptor signaling to cell migration in breast cancer cells. *Breast Cancer Res*  
591 2010, 12:R60.
- 592 18. Al-Ejeh F, Miranda M, Shi W, Simpson PT, Song S, Vargas AC, Saunus JM, Smart CE,  
593 Mariasegaram M, Wiegman AP, et al: Kinome profiling reveals breast cancer  
594 heterogeneity and identifies targeted therapeutic opportunities for triple negative breast  
595 cancer. *Oncotarget* 2014, 5:3145-3158.
- 596 19. Javaid S, Zhang J, Smolen GA, Yu M, Wittner BS, Singh A, Arora KS, Madden MW, Desai  
597 R, Zubrowski MJ, et al: MAPK7 Regulates EMT Features and Modulates the Generation  
598 of CTCs. *Mol Cancer Res* 2015, 13:934-943.
- 599 20. Miranda M, Rozali E, Khanna KK, Al-Ejeh F: MEK5-ERK5 pathway associates with poor  
600 survival of breast cancer patients after systemic treatments. *Oncoscience* 2015, 2:99-101.
- 601 21. Simoes AE, Rodrigues CM, Borralho PM: The MEK5/ERK5 signalling pathway in cancer:  
602 a promising novel therapeutic target. *Drug Discov Today* 2016, 21:1654-1663.
- 603 22. Carpenter AE, Jones TR, Lamprecht MR, Clarke C, Kang IH, Friman O, Guertin DA,  
604 Chang JH, Lindquist RA, Moffat J, et al: CellProfiler: image analysis software for  
605 identifying and quantifying cell phenotypes. *Genome Biol* 2006, 7:R100.
- 606 23. Liu T, Winter M, Thierry B: Quasi-spherical microwells on superhydrophobic substrates  
607 for long term culture of multicellular spheroids and high throughput assays. *Biomaterials*  
608 2014, 35:6060-6068.
- 609 24. Al-Ejeh F, Simpson PT, Saunus JM, Klein K, Kalimutho M, Shi W, Miranda M, Kutasovic J,  
610 Raghavendra A, Madore J, et al: Meta-analysis of the global gene expression profile of  
611 triple-negative breast cancer identifies genes for the prognostication and treatment of  
612 aggressive breast cancer. *Oncogenesis* 2014, 3:e100.
- 613 25. McCart Reed AE, Saunus JM, Ferguson K, Niland C, Simpson PT, Lakhani SR: The  
614 Brisbane Breast Bank. *Open Journal of Bioresources* 2018, 5:5.
- 615 26. Cummings MC, Simpson PT, Reid LE, Jayanthan J, Skerman J, Song S, McCart Reed AE,  
616 Kutasovic JR, Morey AL, Marquart L, et al: Metastatic progression of breast cancer:  
617 insights from 50 years of autopsies. *J Pathol* 2014, 232:23-31.
- 618 27. Kutasovic JR, McCart Reed AE, Males R, Sim S, Saunus JM, Dalley A, McEvoy CR,  
619 Dedina L, Miller G, Peyton S, et al: Breast cancer metastasis to gynaecological organs: a  
620 clinico-pathological and molecular profiling study. *J Pathol Clin Res* 2019, 5:25-39.
- 621 28. Pavan S, Meyer-Schaller N, Diepenbruck M, Kalathur RKR, Saxena M, Christofori G: A  
622 kinome-wide high-content siRNA screen identifies MEK5-ERK5 signaling as critical for  
623 breast cancer cell EMT and metastasis. *Oncogene* 2018.
- 624 29. Yan C, Luo H, Lee JD, Abe J, Berk BC: Molecular cloning of mouse ERK5/BMK1 splice  
625 variants and characterization of ERK5 functional domains. *J Biol Chem* 2001,  
626 276:10870-10878.

- 627 30. McCaw BJ, Chow SY, Wong ES, Tan KL, Guo H, Guy GR: Identification and  
628 characterization of mErk5-T, a novel Erk5/Bmk1 splice variant. *Gene* 2005, 345:183-190.
- 629 31. Buschbeck M, Ullrich A: The unique C-terminal tail of the mitogen-activated protein kinase  
630 ERK5 regulates its activation and nuclear shuttling. *J Biol Chem* 2005, 280:2659-2667.
- 631 32. Madak-Erdogan Z, Ventrella R, Petry L, Katzenellenbogen BS: Novel roles for ERK5 and  
632 cofilin as critical mediators linking ERalpha-driven transcription, actin reorganization, and  
633 invasiveness in breast cancer. *Mol Cancer Res* 2014, 12:714-727.
- 634 33. Yamashita N, Tokunaga E, Kitao H, Hisamatsu Y, Taketani K, Akiyoshi S, Okada S,  
635 Aishima S, Morita M, Maehara Y: Vimentin as a poor prognostic factor for triple-negative  
636 breast cancer. *J Cancer Res Clin Oncol* 2013, 139:739-746.
- 637 34. Kashiwagi S, Yashiro M, Takashima T, Aomatsu N, Kawajiri H, Ogawa Y, Onoda N,  
638 Ishikawa T, Wakasa K, Hirakawa K: c-Kit expression as a prognostic molecular marker in  
639 patients with basal-like breast cancer. *Br J Surg* 2013, 100:490-496.
- 640 35. Kondoh K, Terasawa K, Morimoto H, Nishida E: Regulation of nuclear translocation of  
641 extracellular signal-regulated kinase 5 by active nuclear import and export mechanisms.  
642 *Mol Cell Biol* 2006, 26:1679-1690.
- 643 36. Gomez N, Erazo T, Lizcano JM: ERK5 and Cell Proliferation: Nuclear Localization Is  
644 What Matters. *Front Cell Dev Biol* 2016, 4:105.
- 645 37. Wrobel K, Zhao YC, Kulkoyluoglu E, Chen KL, Hieronymi K, Holloway J, Li S, Ray T, Ray  
646 PS, Landesman Y, et al: ERalpha-XPO1 Cross Talk Controls Tamoxifen Sensitivity in  
647 Tumors by Altering ERK5 Cellular Localization. *Mol Endocrinol* 2016, 30:1029-1045.
- 648 38. Erazo T, Moreno A, Ruiz-Babot G, Rodriguez-Asiain A, Morrice NA, Espadamala J,  
649 Bayascas JR, Gomez N, Lizcano JM: Canonical and kinase activity-independent  
650 mechanisms for extracellular signal-regulated kinase 5 (ERK5) nuclear translocation  
651 require dissociation of Hsp90 from the ERK5-Cdc37 complex. *Mol Cell Biol* 2013,  
652 33:1671-1686.
- 653 39. Rodriguez-Pinilla SM, Sarrio D, Honrado E, Hardisson D, Calero F, Benitez J, Palacios J:  
654 Prognostic significance of basal-like phenotype and fascin expression in node-negative  
655 invasive breast carcinomas. *Clin Cancer Res* 2006, 12:1533-1539.
- 656 40. Maimaiti Y, Liu Z, Tan J, Abudureyimu K, Huang B, Liu C, Guo Y, Wang C, Nie X, Zhou J,  
657 Huang T: Dephosphorylated cofilin expression is associated with poor prognosis in cases  
658 of human breast cancer: a tissue microarray analysis. *Onco Targets Ther* 2016,  
659 9:6461-6466.
- 660 41. Zhou C, Nitschke AM, Xiong W, Zhang Q, Tang Y, Bloch M, Elliott S, Zhu Y, Bazzone L,  
661 Yu D, et al: Proteomic analysis of tumor necrosis factor-alpha resistant human breast  
662 cancer cells reveals a MEK5/Erk5-mediated epithelial-mesenchymal transition phenotype.  
663 *Breast Cancer Res* 2008, 10:R105.
- 664 42. Liu F, Zhang H, Song H: Upregulation of MEK5 by Stat3 promotes breast cancer cell  
665 invasion and metastasis. *Oncol Rep* 2017, 37:83-90.



- 666 43. Morikawa M, Koinuma D, Mizutani A, Kawasaki N, Holmborn K, Sundqvist A, Tsutsumi S,  
667 Watabe T, Aburatani H, Heldin CH, Miyazono K: BMP Sustains Embryonic Stem Cell  
668 Self-Renewal through Distinct Functions of Different Kruppel-like Factors. *Stem Cell*  
669 *Reports* 2016, 6:64-73.
- 670 44. Chen R, Yang Q, Lee JD: BMK1 kinase suppresses epithelial-mesenchymal transition  
671 through the Akt/GSK3beta signaling pathway. *Cancer Res* 2012, 72:1579-1587.
- 672 45. Liang Z, Xie W, Wu R, Geng H, Zhao L, Xie C, Li X, Huang C, Zhu J, Zhu M, et al: ERK5  
673 negatively regulates tobacco smoke-induced pulmonary epithelial-mesenchymal  
674 transition. *Oncotarget* 2015, 6:19605-19618.
- 675 46. Zhai L, Ma C, Li W, Yang S, Liu Z: miR-143 suppresses epithelial-mesenchymal transition  
676 and inhibits tumor growth of breast cancer through down-regulation of ERK5. *Mol*  
677 *Carcinog* 2016, 55:1990-2000.
- 678 47. Creighton CJ, Gibbons DL, Kurie JM: The role of epithelial-mesenchymal transition  
679 programming in invasion and metastasis: a clinical perspective. *Cancer Manag Res* 2013,  
680 5:187-195.
- 681 48. Rokavec M, Kaller M, Horst D, Hermeking H: Pan-cancer EMT-signature identifies  
682 RBM47 down-regulation during colorectal cancer progression. *Sci Rep* 2017, 7:4687.

683 **Figures**

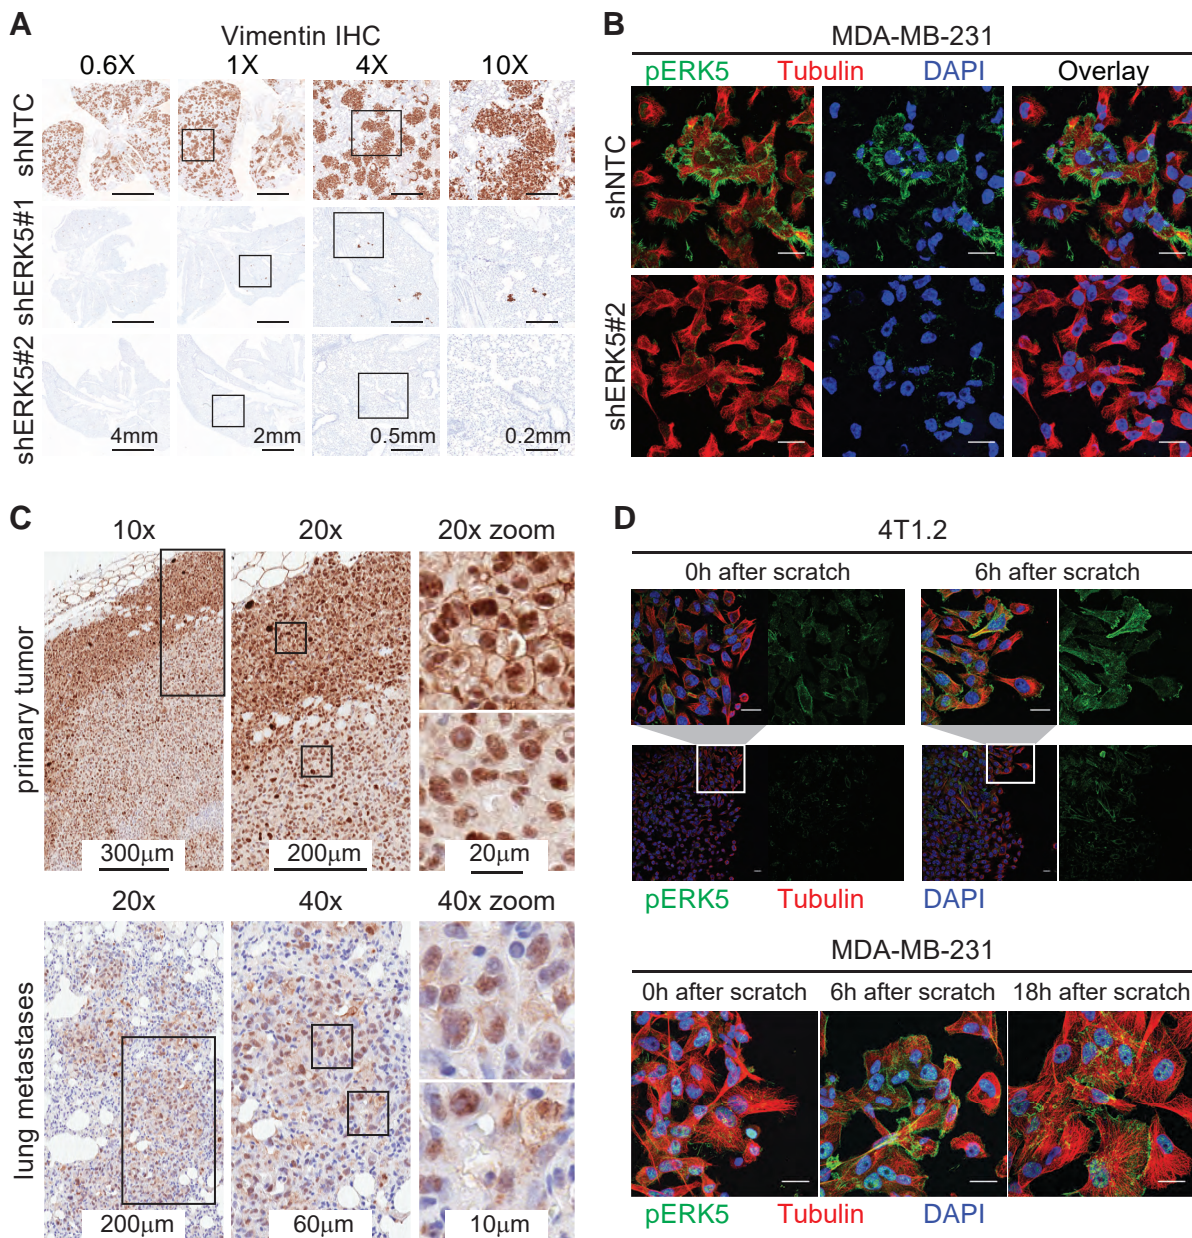

684

685 **Figure 1: Active ERK5 changes subcellular localization during metastasis and cell migration.**  
 686 (A) Spontaneous lung metastasis from primary tumors established from control (shNTC) or *ERK5*-depleted  
 687 (shERK5#1 or shERK5#2) MDA-MB-231 cells. IHC for human vimentin was used to detect cancer cells.  
 688 Representative images are shown at different magnifications; scale bars represent the lengths indicated. Refer to  
 689 Figure S1A-C for complete metastasis models data. (B) Immunofluorescence (IF) with anti-pERK5 (Cell Signaling,  
 690 green) and  $\alpha$ -Tubulin (red) antibodies, and DAPI (blue) in control or *ERK5*-depleted MDA-MB-231 cells. Images  
 691 shown are projections of Z-stacks from confocal microscopy (scale bar = 20  $\mu$ m). Refer to **Additional File 1** for  
 692 antibody specificity validation and IF in 4T1.2 and MCF7 cells. (C) Subcellular localization of pERK5 in primary  
 693 MDA-MB-231 xenografts and matched lung metastasis. Representative IHC images are shown where elevated  
 694 levels of extranuclear pERK5 was observed at the tumor border (invasive front), while the tumor core showed  
 695 predominant nuclear pERK5 staining. Nuclear and extranuclear pERK5 staining patterns were also observed in  
 696 matched lung metastases. (D) Localization of pERK5 in MDA231 and 4T1.2 cells during scratch wound-healing  
 697 assays. Scratch wounds were generated in sub-confluent cultures and cells were fixed immediately (0h), 6 hours or  
 698 18 hours later to allow cell migration before IF staining. Representative images are shown (scale bar = 20  $\mu$ m).

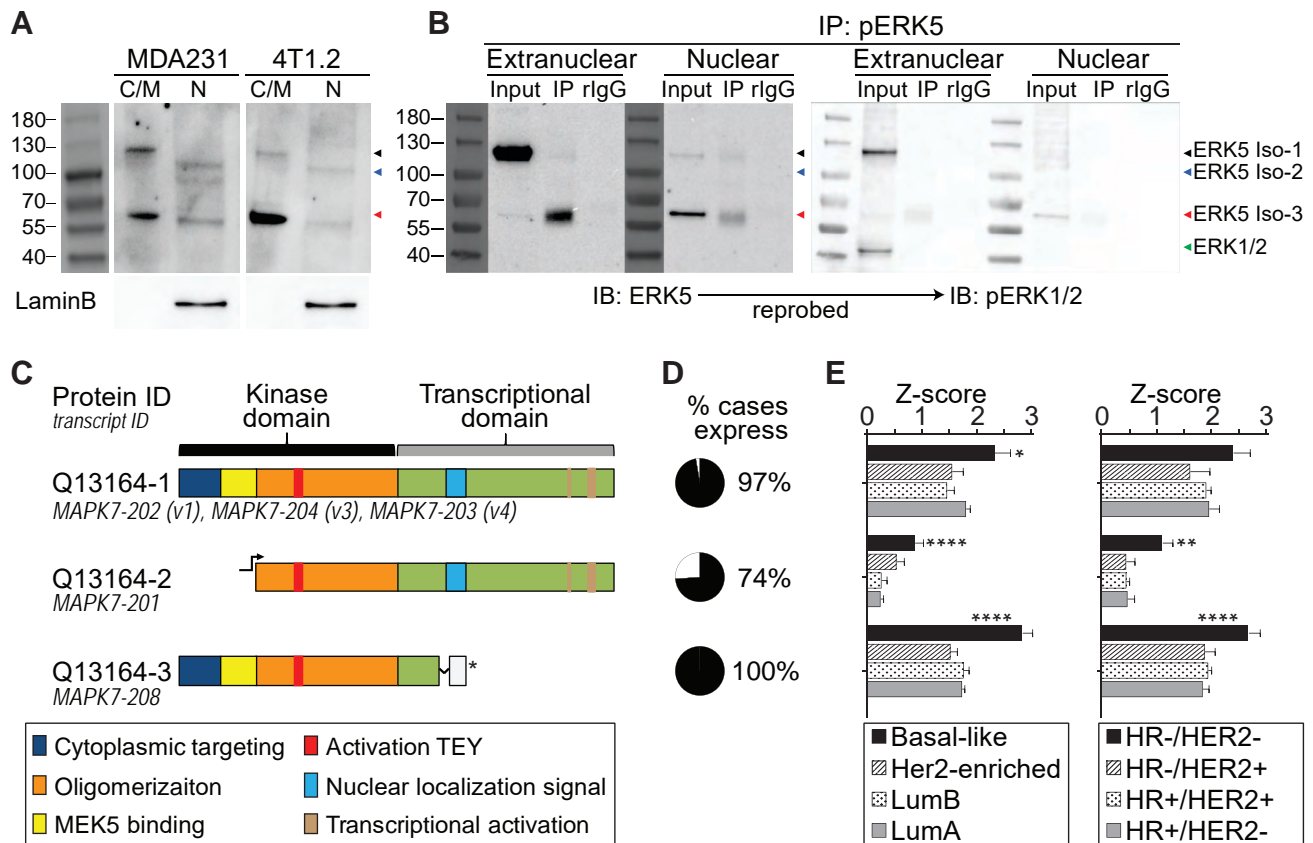

770 **Figure 2: ERK5 isoforms, their activation and localization in breast cancer cells.**  
 771 (A) Immunoblot of cytoplasmic and nuclear fractions from MDA-MB-231 (MDA231) and 4T1.2 cells with an  
 772 anti-pERK5 antibody (Merck Millipore). Cell-fraction quality confirmed by the nuclear marker Lamin B1.  
 773 (B) Immunoprecipitation (IP) with another anti-pERK5 antibody (Cell Signaling) using cytoplasmic and nuclear  
 774 fractions of MDA231 cells followed by immunoblotting (IB) with total ERK5 antibody. The blot (without stripping)  
 775 was then re-probed with pERK1/2 antibody to exclude cross-reactivity. (C) Schematic presentation of ERK5 domains  
 776 and motifs of the transcripts expressed in breast cancer TCGA RNA-seq dataset (see Figure S2 for all transcripts).  
 777 (D) Pie charts depicting the percentage (in black) of cases with expression of ERK5 transcripts (z-score > 0).  
 778 (E) Comparison of the expression of ERK5 transcripts across the molecular (PAM50) and histological (IHC)  
 779 subtypes of breast cancer (HR+: ER+/ PR+). Two-way ANOVA with Dunnett multiple comparisons test was used to  
 780 compare the expression of each transcript (\* P<0.05, \*\* P<0.01, \*\*\*\* P<0.0001)

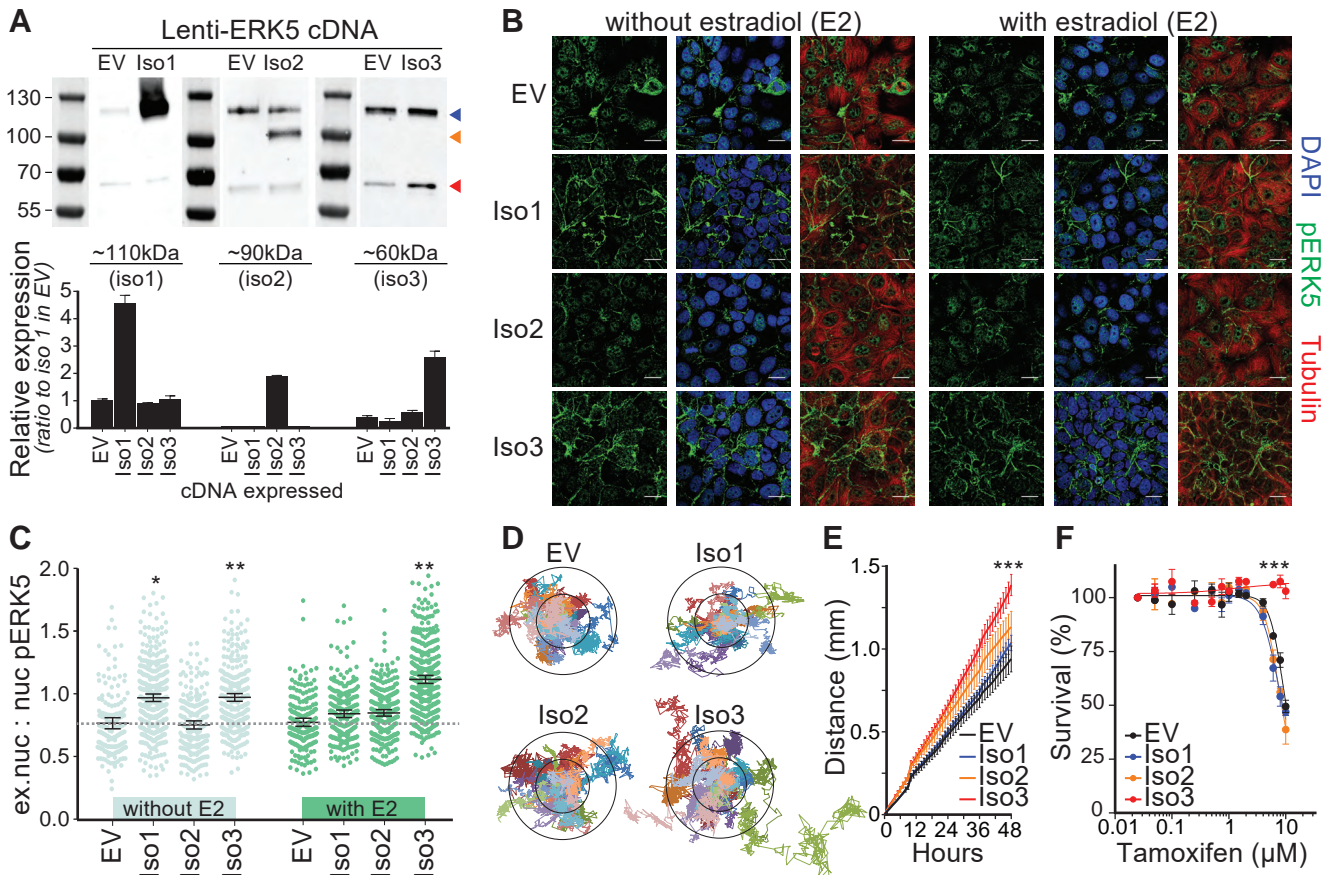

781

782 **Figure 3: ERK5 isoforms modulate pERK5 localization and cellular functions.**

783 (A) IB and quantification (n = 5 independent blots) with total ERK5 antibody confirming the stable expression of  
 784 cDNA encoding full length (isoform-1, Iso1), N-terminal truncated (isoform-2, Iso2), or C-terminal truncated  
 785 (Isoform-3, Iso3) ERK5 in MCF7 cells (Figure S3D). (B) IF for pERK5 in the MCF7 lines expressing empty vector  
 786 (EV) or each of the three ERK5 isoforms in the absence or presence of 10 nM estradiol (E2, 45 min). Representative  
 787 images are shown (bar = 20  $\mu\text{m}$ , z-stacks); an independent set of images are shown in Figure S3E. (C) The ratio of  
 788 extranuclear (ex.nuc) to nuclear (nuc) pERK5 fluorescence intensity was measured and compared after  
 789 segmentation of cell compartments using CellProfiler (n = 4 per cell line, > 200 cells analyzed, one-way ANOVA,  
 790 \* P<0.05 and \*\* P <0.01). (D) Real time cell motility assays using the HoloMonitor<sup>®</sup> M4 system. Cell motility of 25-28  
 791 cells was tracked (left); inner and outer circles mark 50 and 100  $\mu\text{m}$  distance, respectively. Comparison of cell  
 792 motility over time (right) of the four MCF7 cell lines showed that only isoform-3 expressing cells had a significant  
 793 increase (P<0.001, end-point comparison, one-way ANOVA). Cell migration assays, Transwell using CIM-plates,  
 794 also showed increased cell migration of MCF7 cells expressing isoform-3 (Figure S3F). (E) Isoform-3 expressing  
 795 MCF7 cells showed resistance to tamoxifen compared to other MCF7 lines (3 experiments, 6 replicates each).

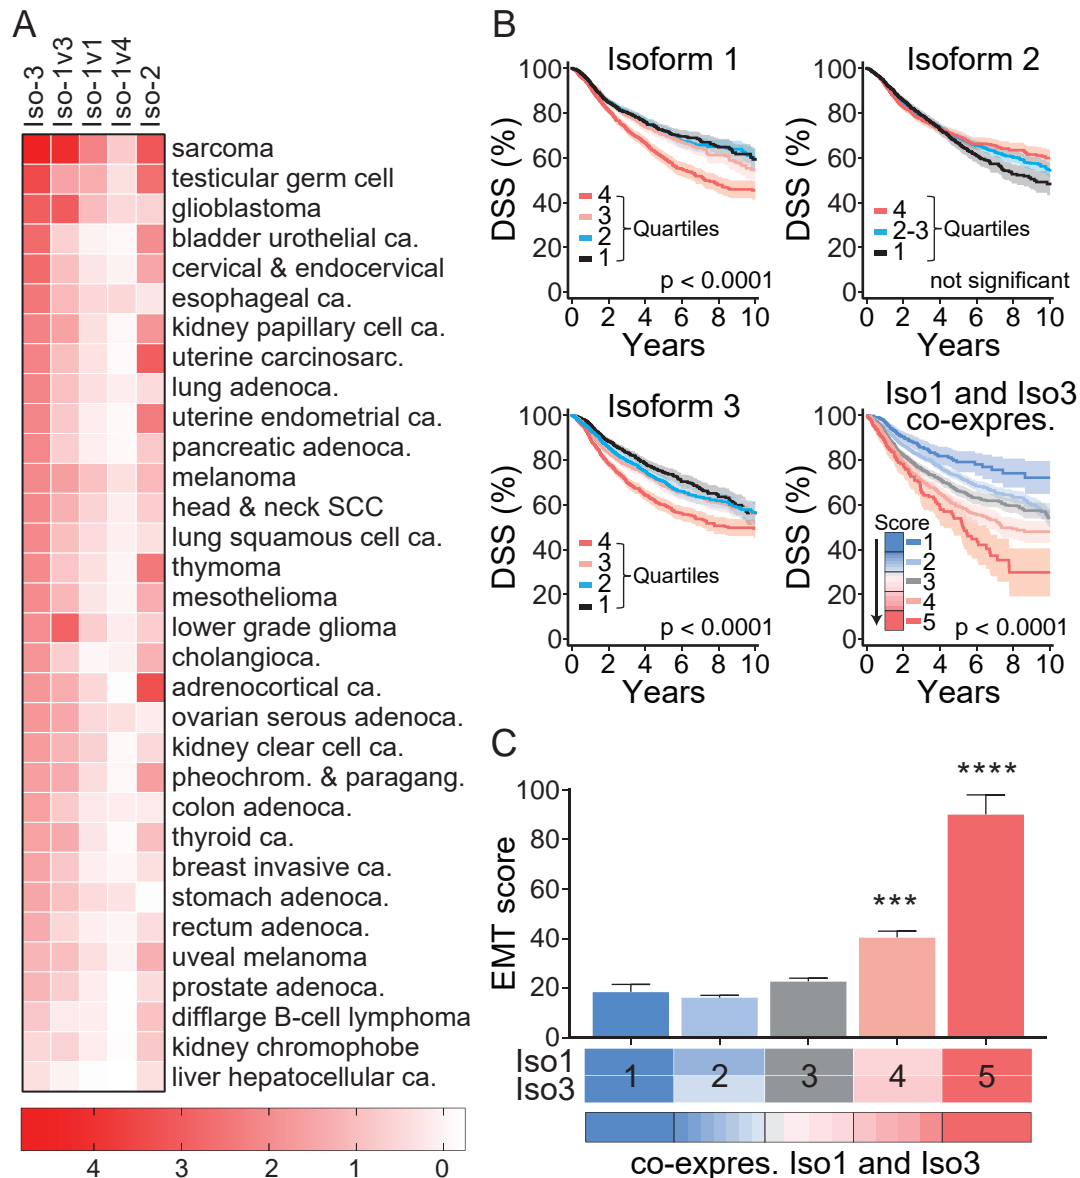

796

797 **Figure 4: ERK5 isoform-3 expression in cancers associates with EMT.**

798 (A) The pan-cancer TCGA RNA-seq data (transcript expression RSEM-FPKM) was analyzed using the UCSC Xena  
 799 platform (<http://xena.ucsc.edu/>) for the expression of the 18 *ERK5* transcripts (Table S4). The heatmap summarizes  
 800 the expression of the 3 transcripts encoding full length ERK5, and the two transcripts encoding isoforms 2 and 3  
 801 across cancer types. Data shown are the average z-score (based on the average of all 18 *ERK5* transcripts across  
 802 all cancers). (B) Association of *ERK5* isoforms expression with disease-specific survival (DSS) in the TCGA  
 803 pan-cancer patients (n = 9,459; 9,009 with DSS information). The expression of three transcripts encoding  
 804 full-length ERK5 (isoform-1) was combined (see Figure S4A). Isoform-1 and isoform-3 expression associated  
 805 significantly with survival (log-rank test p-value shown), but not isoform-2. The combined co-expression of isoform-1  
 806 and isoform-3, depicted as a score and divided into five groups (Table S4), was more significantly associated with  
 807 survival. (C) Association of the co-expression of ERK5 isoforms 1 and 3 (summarized into 5 groups) with EMT  
 808 based on analysis of EMT signatures [47, 48] in the TCGA pan-cancer dataset (see Figure S4C, Table S5).  
 809 One-way ANOVA was used for statistical comparisons (\*\*\*) P<0.001, \*\*\*\* P<0.0001).

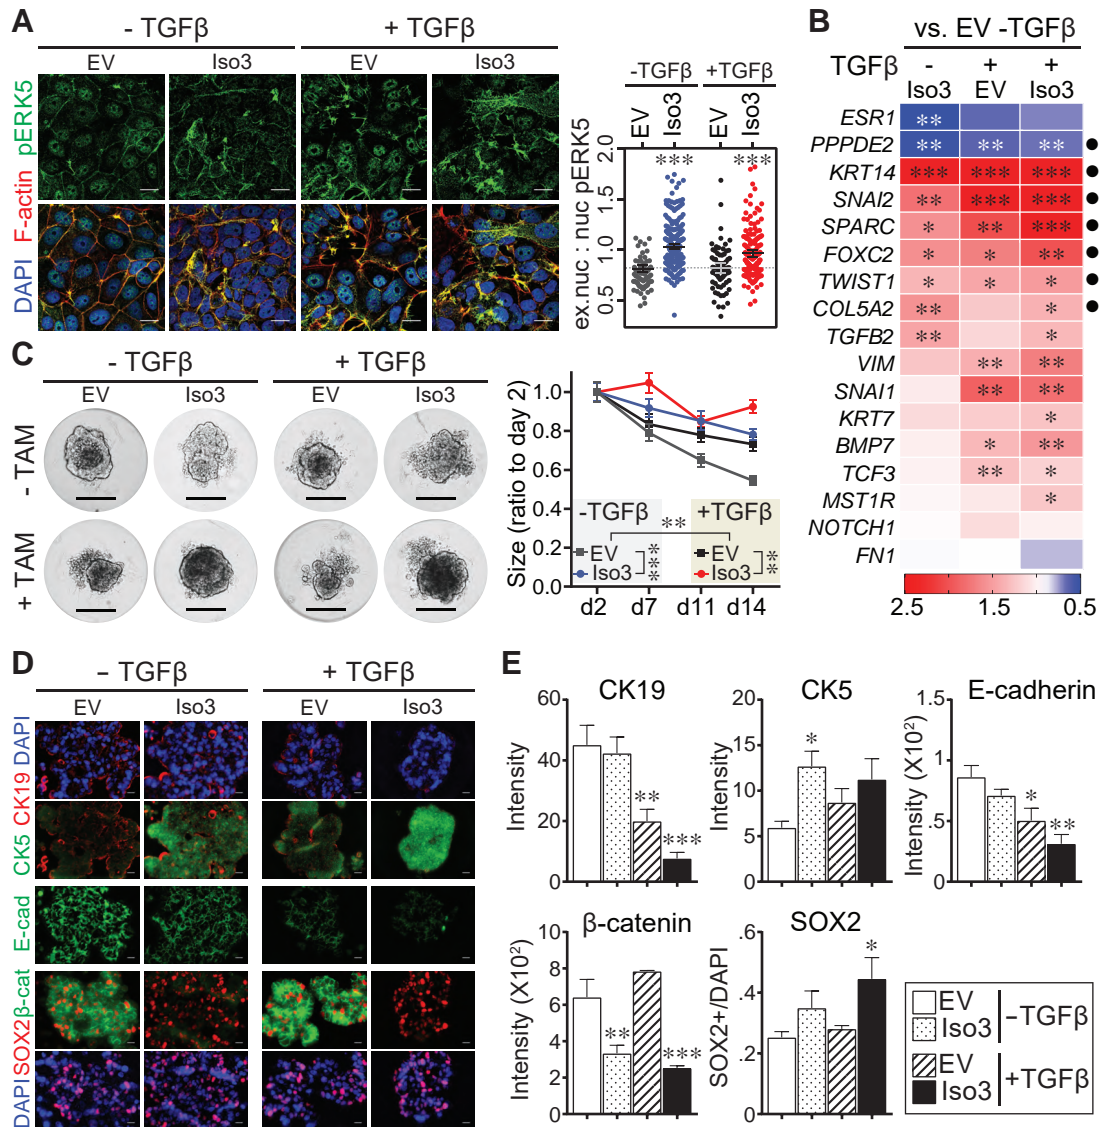

810

811 **Figure 5: ERK5 isoform-3 expression in cancers associates with EMT.**

812 (A) IF for pERK5 in the MCF7 lines expressing empty vector (EV) or ERK5 isoform-3 in the absence or presence of  
 813 10 ng/mL TGFβ. Representative images are shown (bar = 20 μm, z-stacks). The ratio of extranuclear (ex.nuc) to  
 814 nuclear (nuc) pERK5 was measured as described in Figure 3. \*\*\* P < 0.001 one-way ANOVA. (B) RT-qPCR  
 815 validation of genes selected from the RT<sup>2</sup> PCR array for human EMT panel carried out on MCF7-EV and MCF7-Iso3  
 816 cells (Table S6, Figure S5A). Data shown, average of two independent experiments, are the ratios of relative  
 817 expression in comparison to MCF7-EV without TGFβ. \* P < 0.05, \*\* P < 0.01, \*\*\* P < 0.001 one-way ANOVA.  
 818 (C) Response of 3D cultures (spheroids) of MCF7-EV and MCF7-Iso3 cells to tamoxifen (10 μM). Representative  
 819 images on day 7 are shown (scale bar = 0.2 mm). Graph shows the ratio of the size of the spheroids (area from  
 820 imaging) compared to day 2 (n = 25 spheroids). Two-way ANOVA was used for statistical comparison (\*\* P < 0.01,  
 821 \*\*\* P < 0.001). Validation of the EMT genes marked by dots in panel B was done using cDNA prepared from the  
 822 spheroids by RT-qPCR (refer to Figure S5D). (D-E) Representative IF of sections of spheroids stained with  
 823 antibodies against CK19, CK5, E-cadherin, β-catenin and SOX2 (scale bar = 20 μm). Bar graphs in E are the  
 824 average from two experiments with 3 spheroids each. \* P < 0.05, \*\* P < 0.01, \*\*\* P < 0.001, one-way ANOVA.

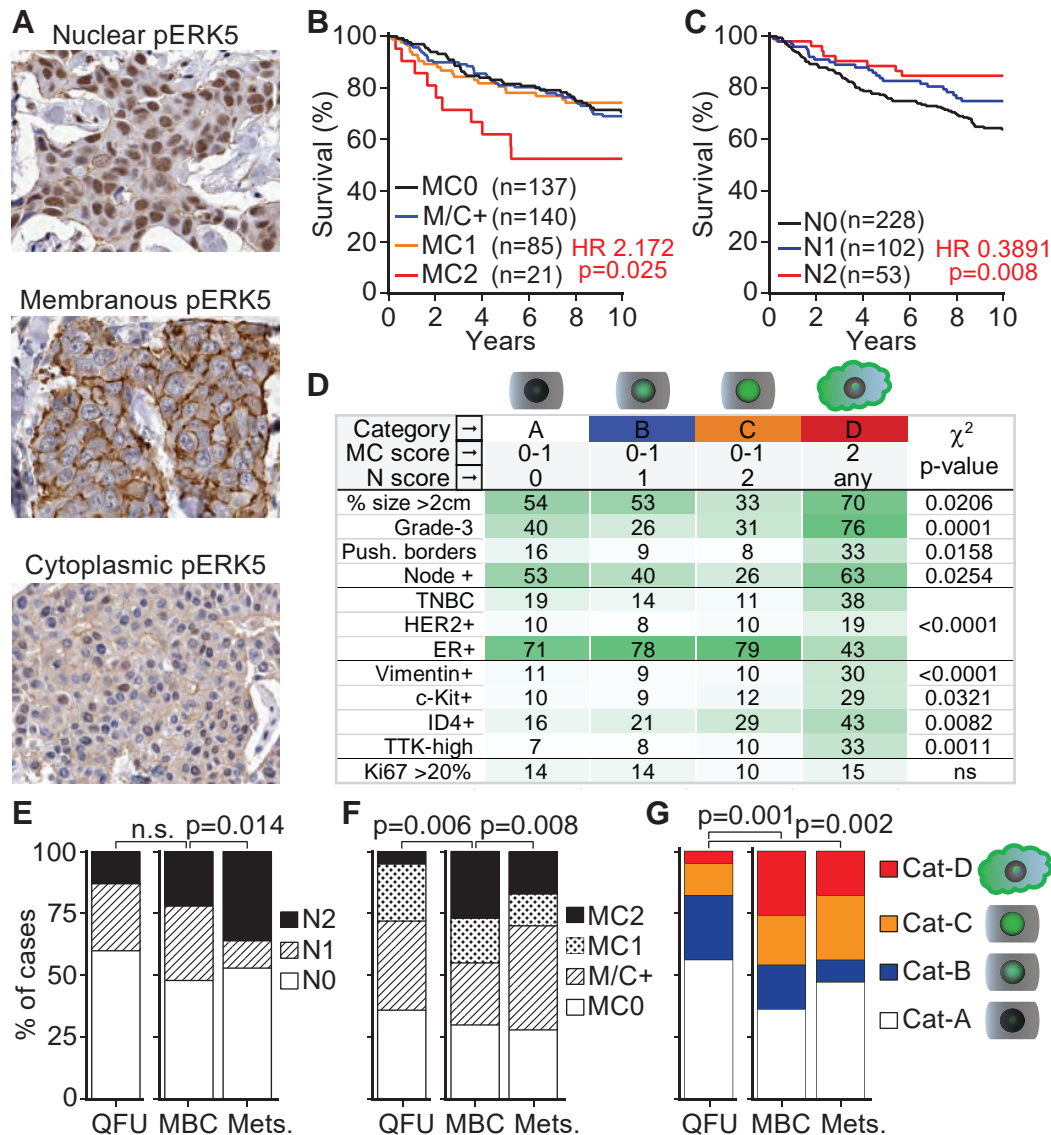

825

826 **Figure 6:** ERK5 activation in primary tumors and metastases from breast cancer patients.  
 827 (A) Staining of the follow-up cohort (QFU, n = 393) for pERK5 (Cell Signaling antibody). Representative images of  
 828 staining patterns are shown. Nuclear staining was scored as negative (N0), positive (N1) or strongly positive (N2);  
 829 membrane staining as negative (M0), < 50% (M1) or > 50% (M2) of tumor cells with continuous staining;  
 830 cytoplasmic staining as negative or positive (C0 or C1). Given the strong correlation, the membrane and  
 831 cytoplasmic staining (extranuclear) were combined into four groups; MC0: negative for both, M/C+: positive for  
 832 either, MC1: cytoplasmic positive and <50% continuous membrane staining; MC2: cytoplasmic positive and >50%  
 833 continuous membrane staining. The 10-year overall survival was significantly stratified based on (B) extranuclear or  
 834 (C) nuclear staining. Hazard ratios (HR) and p values (log-rank test) are shown. Refer to Figure S6A-B for  
 835 supporting data. (D) As the nuclear and extranuclear pERK5 staining were not mutually exclusive (see Figure S6C),  
 836 we consolidated these patterns to four type; Cat-A: negative for extranuclear and nuclear staining, Cat-B: positive  
 837 nuclear staining without strong extranuclear staining; Cat-C: strong nuclear staining without strong extranuclear  
 838 staining; Cat-D: strongly positive for extranuclear pERK5 irrespective of nuclear staining. Cat-D associated with  
 839 aggressive features in the QFU cohort. (E-G) pERK5 staining in primary metastatic tumors (MBC) and metastases  
 840 (Mets) was similarly carried out (MBC n = 70, Mets. n = 215, Table S8, Figure S6E). Chi-square ( $\chi^2$ ) test was used  
 841 for statistical comparisons.

## Additional File 1: Testing the specificity of the pERK5 antibody from Cell Signaling

Immunoprecipitation (IP) and immunoblotting (IB) as well as immunofluorescence were used to evaluate the specificity of the anti-pERK5 antibody from Cell Signaling Technology (product #3371). For this evaluation we used another antibody against pERK5 from Merck Millipore (product #07-507) and antibody against total-ERK5 (tERK5) from Cell Signaling (product #3372).

*It should be noted that the pERK5 antibody from Cell Signaling (pERK5 CS) does not perform by direct IB to detect endogenous or exogenously expressed ERK5. The antibody against pERK5 from Merck Millipore (pERK5 MM) performs in blotting but is suboptimal for IF and immunohistochemistry (Data not shown).*

We first carried out IP with the pERK5 (CS) from MDA-MB-231 expressing non-target control (NTC) or *ERK5*-specific (sh2) shRNAs followed by IB with tERK5 (CS) antibody **Fig.A** or with pERK5 (MM) antibody **Fig.B**. Multiple bands were observed in control cells using either pERK5 or tERK5 antibodies but were reduced in cells with *ERK5* shRNA, indicating that these bands are indeed pERK5 isoforms. In both experiments in **Fig.A&B**, we re-probed the blots without any stripping with anti-pERK1/2 antibody (Cell Signaling) to test if the pERK5 antibody also precipitates pERK1/2. As shown in both Fig.A&B, IB with pERK1/2 detected pERK1/2 in the input but not after IP with the pERK5 (CS) antibody.

This confirmed that the three bands observed are indeed pERK5 which were specifically immunoprecipitated by the pERK5 (CS) antibody because:

1. bands from IP with pERK5 (CS) were detected by tERK5 antibody (**Fig.A**)
2. bands from IP with pERK5 (CS) were detected by pERK5 (MM) antibody (**Fig.B**)
3. bands from IP with pERK5 (CS) reduced with shRNA knockdown of ERK5 (**Fig.A&B**)
4. re-probing (without any stripping)\* with pERK1/2 antibody did not detect bands corresponding to pERK1/2 after IP with pERK5 (CS).

We further confirmed that IP with either pERK5 (CS) or pERK5 (MM) antibodies precipitated different forms of ERK5 (**Fig.C**) because they were:

5. detected by the total ERK5 antibody, tERK5 (CS) antibody, and
6. reduced by the ERK5-specific shRNA (sh2).

Moreover, we also tested if the *ERK5*-specific shRNA affected the expression of ERK1/2 or p38. As shown **Fig.D**, total ERK1/2 (tERK1/2) or p38 proteins were not affected in *ERK5*-depleted MDA-MB-231 cells. However, the phosphorylation levels (pERK1/2 and p-p38) was reduced most likely due to cell signalling effect in the MAPK signalling pathways. This confirms that:

7. bands observed in **Fig.A-C** are isoforms of ERK5 and that *ERK5* shRNA is specific (**Fig.D**).

Finally, we carried out IF with the human MDA-MB-231 and the mouse 4T1.2 cells (TNBC lines) and the human MCF7 cell line (ER+). ERK5 was depleted in the MDA-MB-231 and 4T1.2 cells using two specific shRNAs in comparison to non-target control (NTC), and IF was carried out in comparison to rabbit IgG control antibody (**Fig.E**). The results show that:

8. IF with pERK5 (CS) antibody is specific (produced signal) compared to equimolar amount of rIgG
9. IF with pERK5 (CS) antibody is specific to ERK5 because signal was diminished by *ERK5* shRNA
10. pERK5 shows different cell localization in TNBC cells compared to the non-TNBC MCF7 cells

\* Re-probing was done by washing the blots with PBS/T followed by blocking, incubation overnight with pERK1/2 antibody, followed by washing and incubation with secondary antibody-HRP, followed by washing then detection (i.e. 24-36 hours after detection of ERK5 bands, hence reduced detection of ERK5 bands in the re-probed blots).



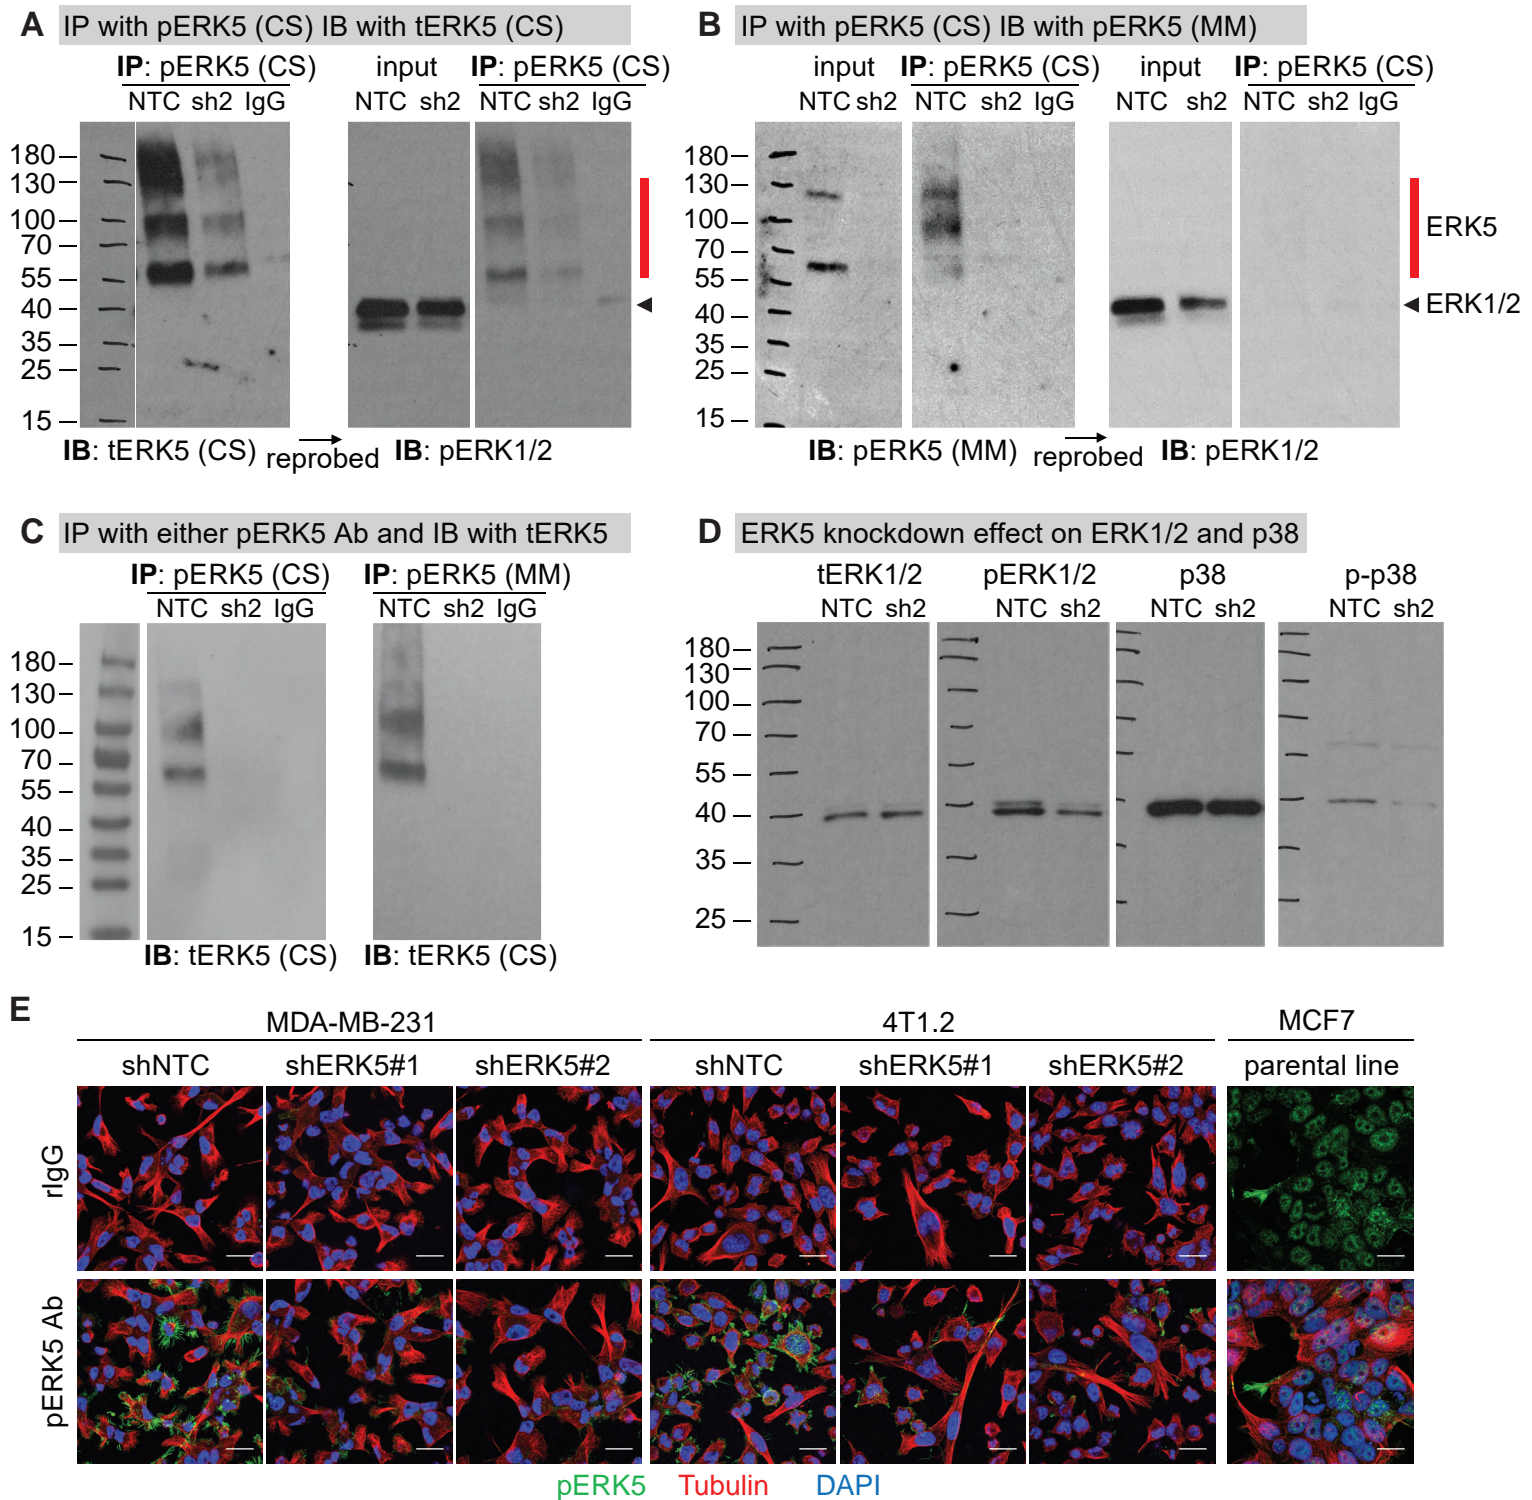

**Fig: Testing the specificity of the pERK5 antibody from Cell Signaling.**

(A-B) MDA-MB-231 cells expressing non-target control (shNTC) or *ERK5*-specific (sh2) shNRA were lysed using RIPA buffer after washing cell cultures with PBS (no trypsin use). Immunoprecipitation (IP) of pERK5 (TEY motif phosphorylation at the T218/Y220 residues) was carried out using pERK5 antibody from Cell Signaling Technologies [pERK5 (CS)] followed by immunoblots (IB) with antibody against total ERK5 protein [tERK5 (CS)] in panel A or another antibody against pERK5 from Merck Millipore [pERK5 (MM)] in panel B. In both experiments, membranes were washed extensively before re-probing (without any stripping) with an antibody against pERK1/2. (C) IP from MDA-MB-231 cells using either pERK5 (CS) or pERK5 (MM) antibodies followed by IB using the tERK5 (CS) antibody. All experiments used IP with beads conjugated with control rabbit IgG was used as control. (D) MDA-MB-231 cells were analyzed for the levels of total and phosphorylated forms of ERK1/2 and p38. (E) Immunofluorescence with pERK5 (CS) antibody in comparison to matching concentration (15  $\mu$ g/mL) of non-specific rabbit IgG (rIgG) antibody. Cells were also stained for  $\alpha$ -Tubulin (cytoskeleton, red) and DAPI (nuclei, blue). Images shown are projections of Z-stacks from confocal microscopy (scale bar = 20  $\mu$ m).

## 842 Supplementary Figures

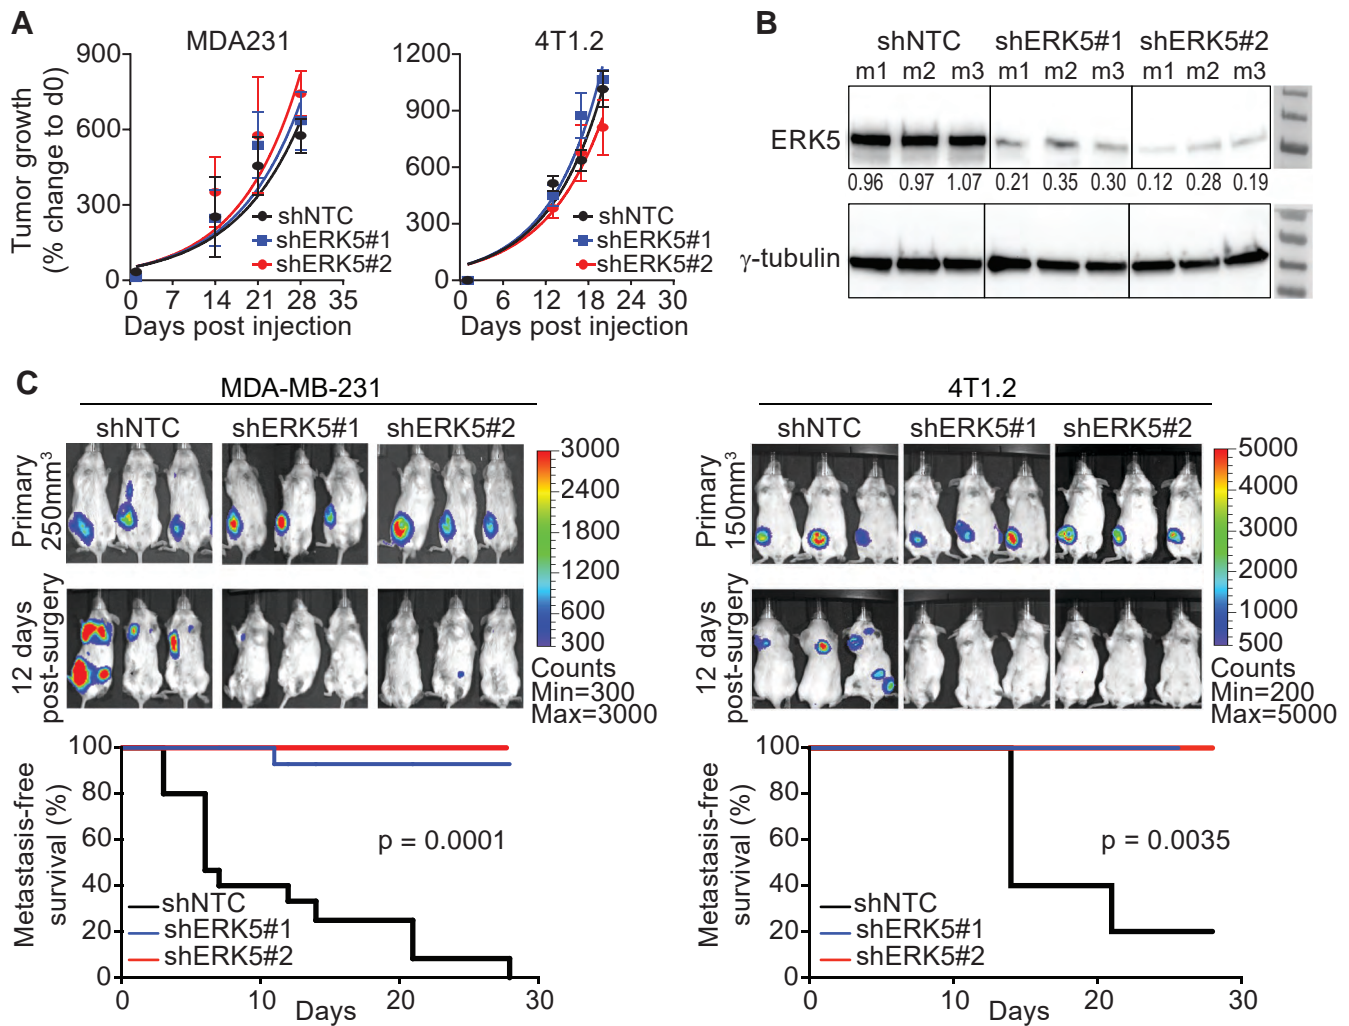

843

844 **Figure S1:** Supporting data for the spontaneous metastasis mouse models.

845 (A) Growth of primary MDA-MB-231 (MDA231) and 4T1.2 control (shNTC) and *ERK5*-depleted (shERK5#1 or  
 846 shERK5#2) tumors based on caliper measurement confirming similar tumor growth rates. (B) Knockdown of ERK5  
 847 was confirmed by immunoblotting using lysates prepared from resected MDA231 tumors (at 250 mm<sup>3</sup> volume). Data  
 848 shown are representative results from three independent mice (m1-m3). (C) MDA231 and 4T1.2 tumors (shNTC  
 849 control and *ERK5*-depleted) were resected from mice at 250 mm<sup>3</sup> or 150 mm<sup>3</sup> volume, respectively, to follow  
 850 metastasis by bioluminescence imaging. Representative images are shown, and metastasis-free survival was  
 851 compared by log-rank test using data combined from independent experiments (MDA231 model: three experiments  
 852 with total n = 15 mice/group, 4T1.2 model: two experiments with total n = 10 mice/group).

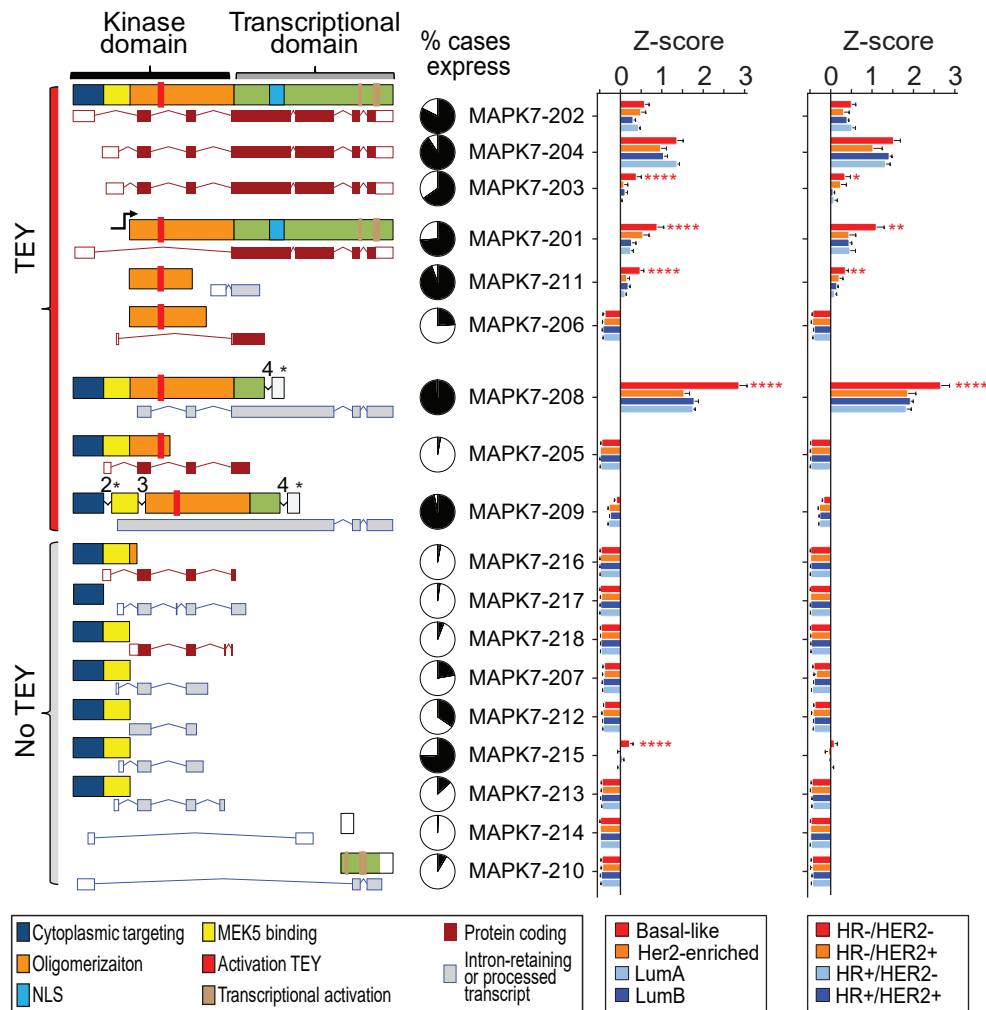

853

854 **Figure S2:** Supporting data for the expression of ERK5 splice variants in breast cancer tissue  
 855 from patients.

856 Expression of *ERK5* transcripts in the TCGA breast cancer RNA-seq dataset. Schematic presentation of ERK5  
 857 domains and motifs across all annotated transcripts (Ensembl, maroon: protein-coding, grey: processed or  
 858 intron-retaining transcripts) which we mapped in the RNA-Seq data from the TCGA BC dataset. Transcripts  
 859 *MAPK7-208* and *MAPK7-209* retain introns which results in premature stop codons becoming in frame for  
 860 translation (\* denote the location of the premature stop in the ERK5 protein). The expression of the transcripts was  
 861 compared according to the PAM50 or IHC (ER, PR and HER2) subtypes. One-way ANOVA with Dunnett multiple  
 862 comparisons test was used to compare the expression of each transcript across groups (\*\* P<0.01, \*\*\* P<0.001,  
 863 \*\*\*\* P<0.0001).

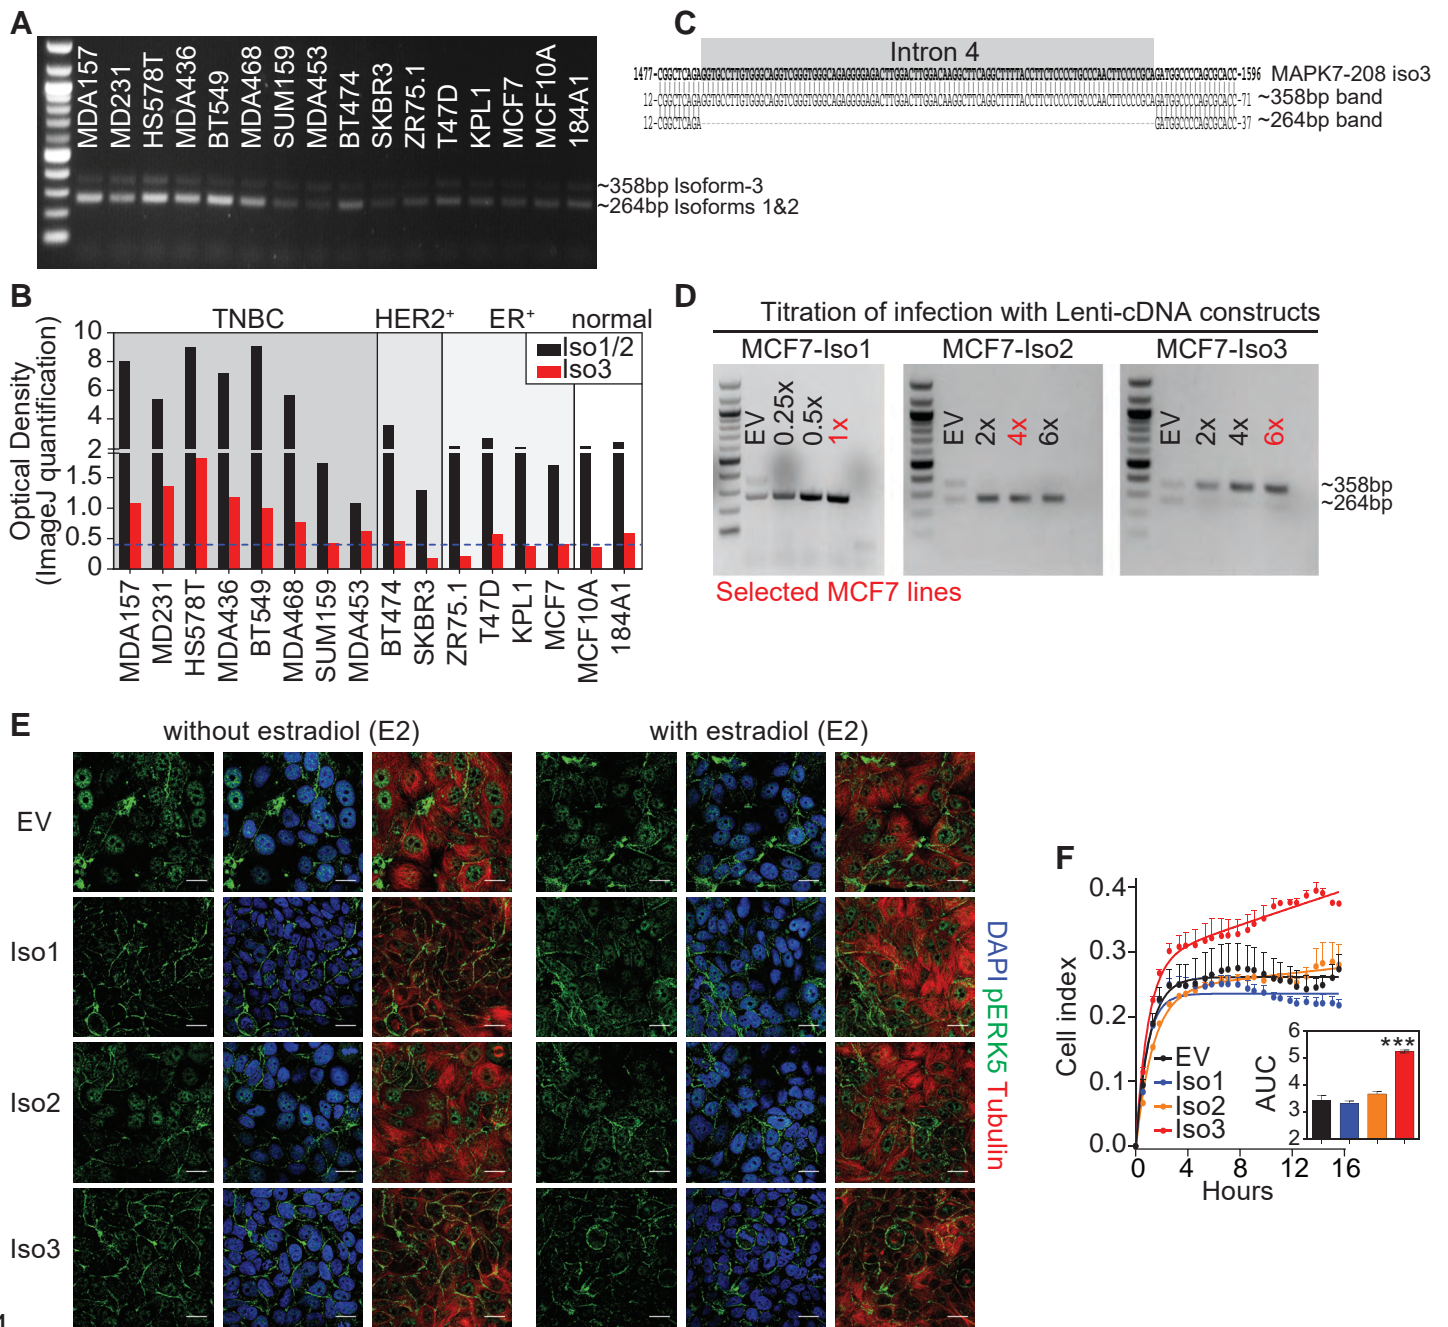

864

865 **Figure S3:** Supporting data for the role of ERK5 isoforms in pERK5 localization.

866 (A & B) PCR across breast cancer cell lines using primers that flank intron 4, retained in the expressed transcript

867 encoding isoform 3 (primer sequences are in Table S3). The intensities of the intron retaining-transcript of isoform-3

868 (upper band ~ 358bp) and the remaining transcripts (lower band ~ 264bp) was measured using ImageJ (panel B).

869 (C) Sequencing was carried out after excising the larger (~ 358bp) and smaller (~ 264bp) amplicons from MDA231

870 cells confirming the presence of intron 4 (in grey) in the larger amplicon. (D) PCR for MCF7 cells after infection with

871 lentivirus without (empty vector, EV) or with cDNAs encoding isoform-1 (left), isoform-2 (middle) or isoform-3 (right)

872 at increasing multiplicity of infection. (E) IF for pERK5 in the MCF7 lines expressing empty vector (EV) or each of

873 the three ERK5 isoforms in the absence or presence of 10 nM estradiol (E2, 45 min). Representative images are

874 shown (bar = 20  $\mu$ m, z-stacks). (F) Real time cell migration assays using the xCELLigence CIM-Plates<sup>®</sup> (n = 2 per

875 cell line, experiment done twice). The area under the curves (AUC) was calculated and compared in GraphPad

876 (one-way ANOVA, \*\*\* P < 0.001).

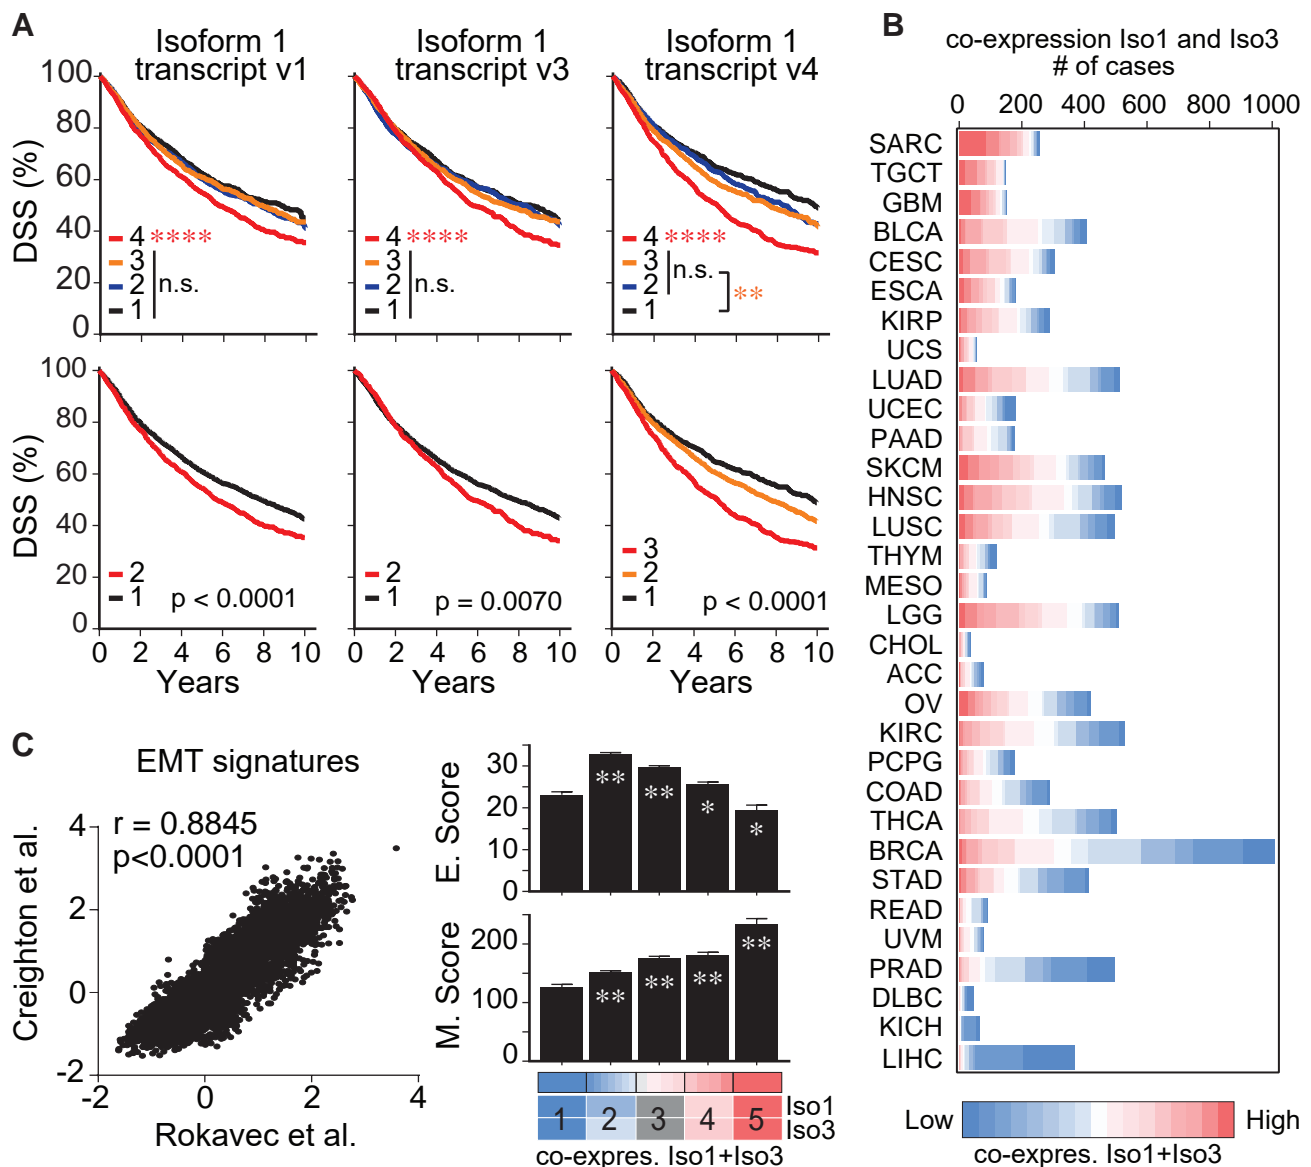

877

878 **Figure S4:** Supporting data for *ERK5* isoforms expression across cancer types and association  
 888 with EMT.

889 (A) The pan-cancer TCGA RNA-seq data (transcript expression RSEM-FPKM) was analyzed using the UCSC Xena  
 890 platform (<http://xena.ucsc.edu>) for the expression of the 18 *ERK5* transcripts (Table S4). Stratification of disease-  
 891 specific survival (DSS) according to the expression of transcripts encoding full length *ERK5* (isoform-1) using  
 892 quartile groups (1: first/lower quartile, 2: second quartile, 3: third quartile, 4: fourth/upper quartile). For isoform-1  
 893 transcript variants 1 and 3 (v1 and v3), only the upper quartile group showed significantly lower survival (\*\*\*\*  
 894 P<0.0001). Thus, patients were classified according to the expression of these transcripts in the lower panels as 1:  
 895 lower than upper quartile vs. 2: higher than upper quartile. For isoform-1 transcript variant 4 (v4), the second and  
 896 third quartiles were not significantly different from each other but were significantly different from lower and upper  
 897 quartiles (\*\* P=0.0074). As shown in the lower panel, patients were classified based on the expression of isoform-1  
 898 transcript v4 as 1: lower quartile, 2: second and third quartiles, 3: upper quartile. (B) Correlation of two published  
 899 EMT signatures [30,31] were used in combination to calculate EMT scores. The Epithelial score (E.Score) and the  
 900 Mesenchymal score (M.Score) were calculated as the average expression of the genes associated with epithelial  
 901 and mesenchymal states, respectively. These scores were compared across the 5 groups of the co-expression  
 902 levels of *ERK5* isoforms 1 and 3. \* P<0.05, \*\* P<0.01, one-way ANOVA. (C) High co-expression of isoforms 1 and  
 903 3 (red) was not restricted to a cancer type and evident in several cancers in the TCGA. All cancer cases in all cancer  
 904 types are presented; each case is colored according to its value for the co-expression of isoforms 1 and 3.

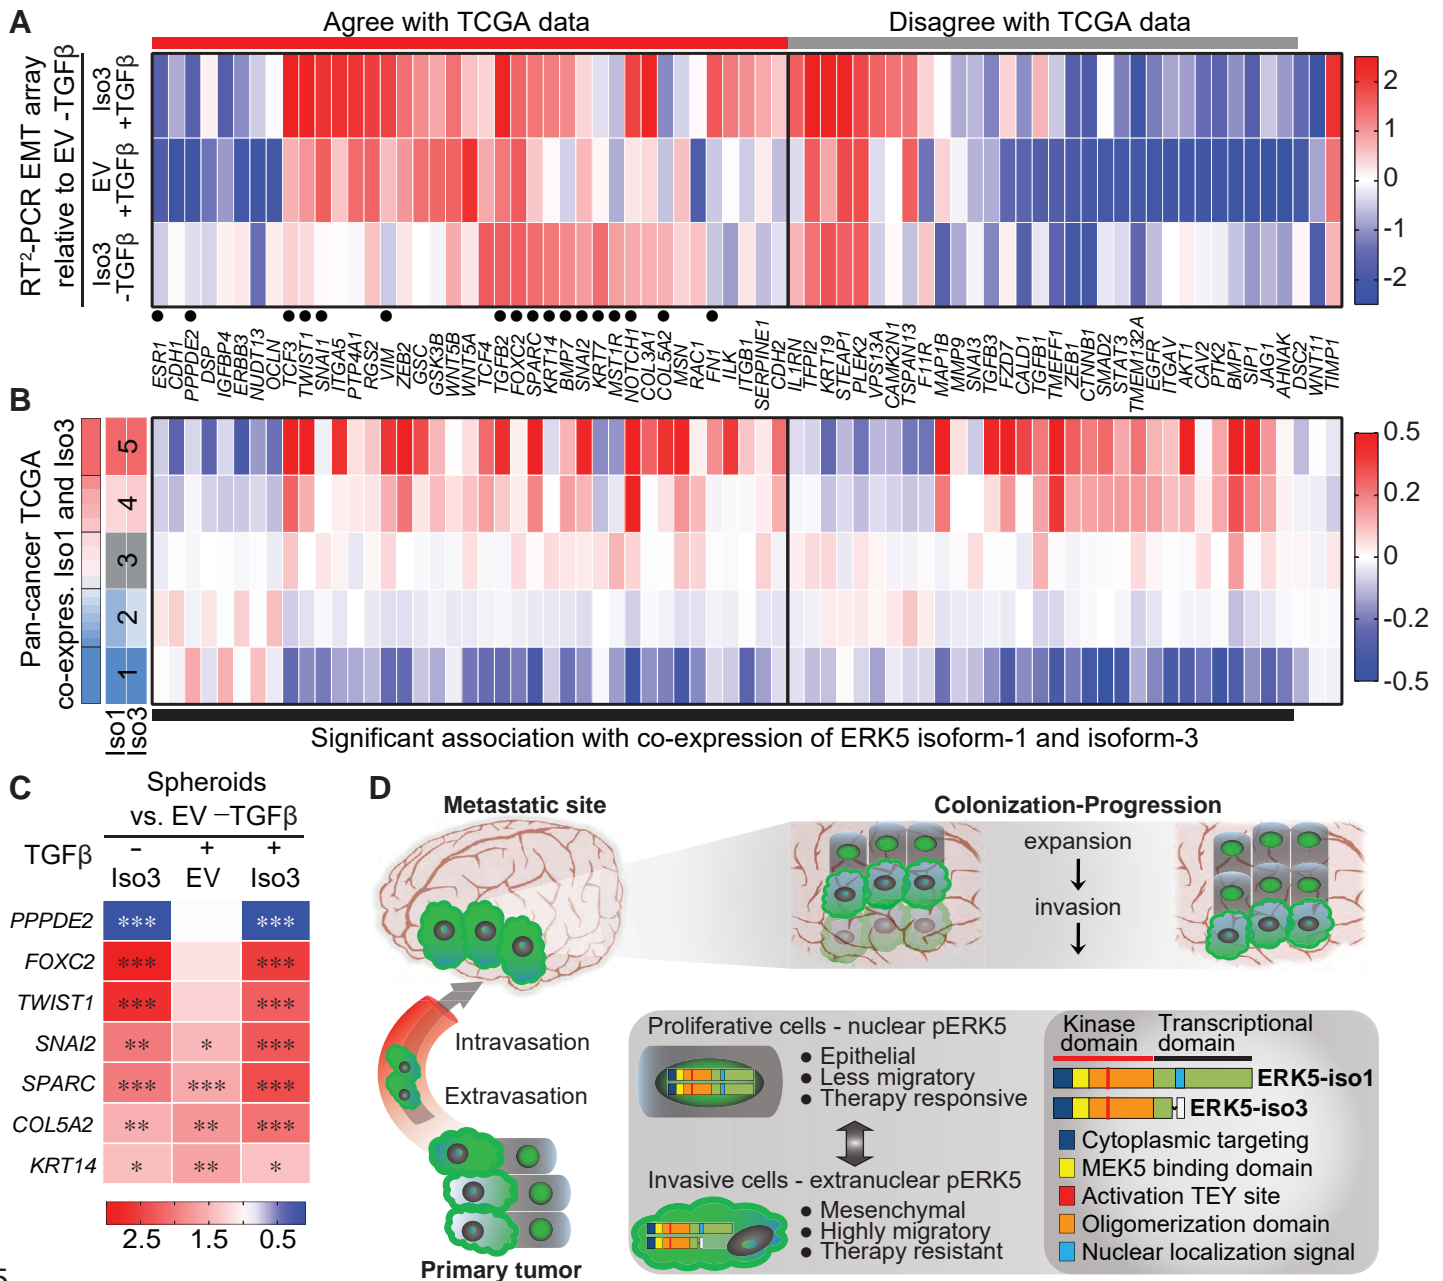

905

906 **Figure S5:** Supporting data for ERK5 isoform-3 role in epithelial-mesenchymal transition.

907 (A) RT<sup>2</sup> PCR array for human EMT panel on MCF7-EV (control) and MCF7-Iso3 cells in the absence of presence of  
 908 TGFβ (10 ng/mL) carried out on technical duplicates (Table S5). The heatmap summarizes the relative expression  
 909 of the genes as the ratio to MCF7-EV without TGFβ. Genes marked with dots were selected for validation in  
 910 Figure 6B. (B) The expression of genes from RT<sup>2</sup> PCR array for human EMT panel in the Pan-Cancer TCGA dataset  
 911 grouped as per the co-expression of isoforms 1 and 3. The Heatmap shows the expression (Z-score) of each gene  
 912 across the 5 groups and one-way ANOVA was used for statistical comparison of each gene across the different  
 913 groups. (C) RT-PCR validation of selected EMT genes, which were driven by isoform-3 specifically, using cDNA  
 914 prepared from MCF7 spheroids (25 spheres per group). \* P<0.05, \*\* P<0.01, \*\*\* P<0.001 one-way ANOVA.  
 915 (D) Model for a dual role of ERK5 in BC pathobiology, which may be mediated by the shorter ERK5 isoform-3. The  
 916 expression of isoform-3 would increase the extranuclear pERK5 to facilitate EMT and the migration of cells from the  
 917 primary tumor to distant organs (e.g. brain). Through cycles of invasion and expansion, thus shuttling of pERK5,  
 918 overt metastases are formed.

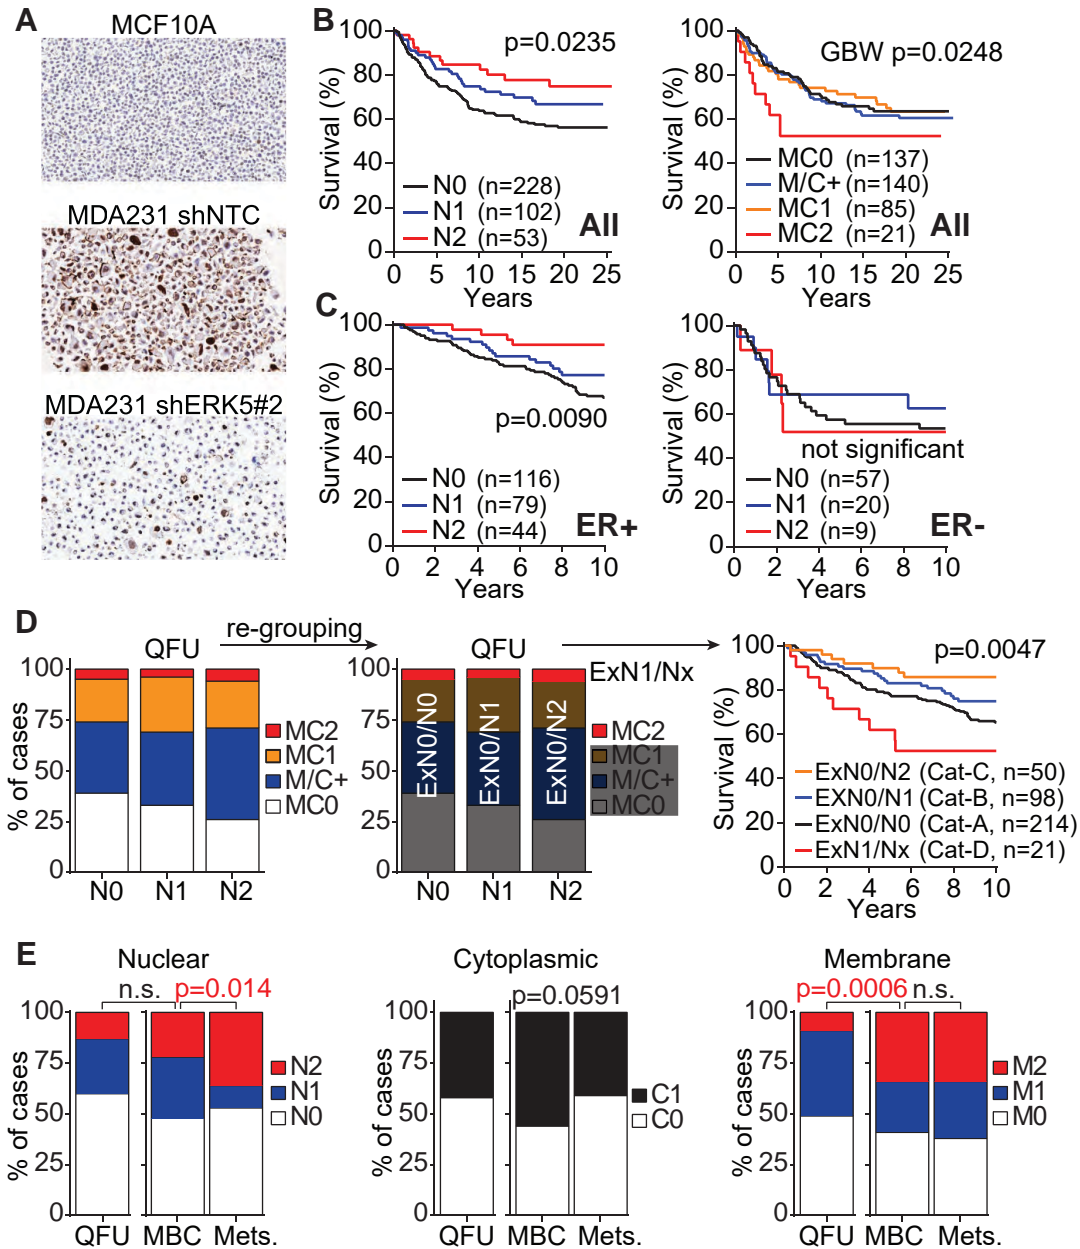

919

920 **Figure S6:** Supporting data for pERK5 staining in breast cancer patients.

921 (A) IHC with pERK5 antibody (from Cell Signaling, 5x magnification) in the normal MCF10A cells and control  
 922 (shNTC) and *ERK5*-depleted (shERK5#2) cells. (B) Complete survival follow-up of breast cancer patients in the  
 923 Follow Up (QFU) cohort of sporadic breast cancer cases and stratification by nuclear (left) and extranuclear (right)  
 924 pERK5 staining. (C) Stratification of overall survival based on nuclear pERK5 staining in ER+ (left) and ER- (right)  
 925 breast cancer. (D) The nuclear and extranuclear pERK5 staining were not mutually exclusive, thus were re-grouped  
 926 as negative for extranuclear (Ex) and nuclear (N) pERK5 (ExN0/N0, Cat-A), positive or strongly positive for nuclear  
 927 pERK5 in the absence of strong extranuclear pERK5 (ExN0/N1 - Cat-B or ExN0/N2 - Cat-C, respectively), or  
 928 strongly positive for extranuclear pERK5 irrespective of nuclear staining (ExN1/Nx, Cat-D). These groups had  
 929 significantly different overall survival (log-rank test). (E) pERK5 staining in primary metastatic tumors (Pri) and  
 930 metastases (Mets) was similarly carried out (Pri.  $n = 70$ , Mets.  $n = 215$ ; 60 Pri. matched with 204 Mets, Tables S8).  
 931 The pERK5 staining in each of the three cellular compartments (cytoplasm, nucleus and membrane) was compared  
 932 with the metastasis cohorts and with the QFU cohort (Chi-square test, GraphPad Prism).
